# Supplementary material
Source: publisher figshare collection journal article supplement (https://gsajournals.figshare.com/ndownloader/files/26176904)
Supplement: Supplementary file 1 [file 26176904]

## Sheet: Housekeeping
Table 3: Accession Numbers for genes used in Housekeeping figures
NCU Accession	Gene ID	Entropy Value
NCU11252	gene1166	0.0885281
NCU05240	gene6403	0.0898498
NCU00577	gene1998	0.104972
NCU04741	gene8356	0.108707
NCU08941	gene8002	0.109741
NCU04054	gene8898	0.111835
NCU06929	gene9476	0.115302
NCU02585	gene738	0.130402
NCU00545	gene2037	0.14939
NCU01393	gene7510	0.150817
NCU01920	gene516	0.151362
NCU09466	gene3544	0.162216
NCU06267	gene4046	0.164481
NCU06200	gene3976	0.164853
NCU05943	gene9032	0.165141
NCU04259	gene7905	0.166341
NCU02840	gene2301	0.168104
NCU08067	gene35	0.185727
NCU09999	gene947	0.190701
NCU04770	gene8389	0.200226
NCU02318	gene10010	0.21225
NCU08515	gene3319	0.219743
NCU05206	gene6441	0.221102
NCU01207	gene7319	0.226608
NCU04413	gene5811	0.235047
NCU09912	gene12	0.235308
NCU08945	gene8006	0.238785
NCU00382	gene4457	0.28965
NCU06857	gene2878	0.308128
NCU08964	gene8027	0.312044
NCU07497	gene109	0.354604
NCU07169	gene8162	0.358972
NCU09492	gene3574	0.389881
NCU01584	gene3214	0.406952
NCU01789	gene3063	0.43143
NCU09451	gene9329	0.486852
NCU07113	gene8224	0.557155
NCU07423	gene1456	0.587402
NCU00658	gene1917	0.740202
NCU08038	gene5967	0.927916
NCU08228	gene4737	1.6164
NCU08097	gene68	2.44498

## Sheet: TranscriptionTranslation
Table 3: Accession Numbers for genes used in Transcription/Translation figures
NCU Accession	Gene ID	Entropy Value
NCU00417	gene4494	0.052095
NCU02717	gene871	0.0566151
NCU03957	gene8799	0.0570696
NCU00753	gene1821	0.0573757
NCU03479	gene2618	0.0582233
NCU03129	gene1097	0.0591482
NCU03782	gene7052	0.0600432
NCU09378	gene928	0.0601204
NCU06059	gene9812	0.0603514
NCU02289	gene10041	0.0604739
NCU09203	gene1422	0.0613447
NCU00571	gene2006	0.0614796
NCU00325	gene4400	0.0626819
NCU02661	gene814	0.0627164
NCU09269	gene2375	0.0638155
NCU01234	gene7348	0.0639146
NCU07862	gene3795	0.0640926
NCU02204	gene10130	0.0645681
NCU00216	gene4283	0.0652381
NCU11372	gene5481	0.0653098
NCU08578	gene955	0.0657064
NCU07280	gene6116	0.0657065
NCU03799	gene7069	0.0657229
NCU00335	gene4410	0.0657907
NCU06740	gene2988	0.0658554
NCU05945	gene9030	0.0661427
NCU04075	gene8919	0.0666423
NCU01273	gene7385	0.0669128
NCU03311	gene1285	0.0680394
NCU09696	gene6698	0.0687425
NCU10352	gene943	0.0691011
NCU06355	gene5605	0.0692544
NCU03526	gene2571	0.07003
NCU02025	gene405	0.0702276
NCU05485	gene8689	0.07048
NCU00210	gene4276	0.0722917
NCU01635	gene3179	0.0724239
NCU05452	gene2853	0.0728041
NCU01696	gene3132	0.0729812
NCU01310	gene7425	0.0739846
NCU05347	gene2785	0.0739943
NCU03345	gene2757	0.0740468
NCU03315	gene1289	0.0748659
NCU07577	gene4626	0.0753149
NCU02079	gene349	0.0755952
NCU00958	gene1597	0.0756415
NCU02553	gene705	0.0756786
NCU03880	gene8732	0.076297
NCU08991	gene4592	0.0767768
NCU01253	gene7364	0.0768708
NCU09673	gene6726	0.0770663
NCU06091	gene9771	0.0776404
NCU03956	gene8798	0.0777637
NCU06994	gene6190	0.0778064
NCU01447	gene7723	0.0788384
NCU04190	gene7843	0.0793687
NCU02004	gene426	0.0794477
NCU00178	gene4242	0.07955
NCU06104	gene9761	0.0795731
NCU03285	gene1254	0.0801861
NCU06193	gene3967	0.0804789
NCU09547	gene7679	0.080566
NCU04427	gene5795	0.0809769
NCU04110	gene7762	0.0810512
NCU00030	gene4086	0.0815668
NCU04037	gene8880	0.0816943
NCU02255	gene10077	0.0819113
NCU05067	gene9171	0.0820405
NCU07382	gene1497	0.0820584
NCU04187	gene7840	0.0822362
NCU00109	gene4169	0.0822746
NCU06498	gene3930	0.0824089
NCU00037	gene4092	0.0825719
NCU07421	gene1458	0.082714
NCU08741	gene3424	0.0827581
NCU03055	gene1021	0.0829607
NCU03971	gene8813	0.0830233
NCU00181	gene4246	0.0834335
NCU02371	gene9945	0.083531
NCU03330	gene2774	0.0835348
NCU06664	gene7578	0.0842779
NCU03670	gene6952	0.0843736
NCU06017	gene9857	0.0843891
NCU01435	gene7738	0.0844047
NCU09435	gene9312	0.0847504
NCU05267	gene6376	0.0851984
NCU02716	gene870	0.0852059
NCU07666	gene5488	0.0857182
NCU02001	gene429	0.0857427
NCU03491	gene2606	0.0857726
NCU09468	gene3546	0.0858745
NCU02966	gene2169	0.0864724
NCU06622	gene5372	0.0867851
NCU01471	gene7698	0.0874941
NCU03815	gene7084	0.0875394
NCU01713	gene3121	0.0877059
NCU10696	gene34	0.0878816
NCU00243	gene4313	0.088
NCU11252	gene1166	0.0885281
NCU08031	gene5960	0.0885814
NCU02738	gene893	0.0887576
NCU09095	gene213	0.0892599
NCU06630	gene5380	0.0893897
NCU02754	gene911	0.0894105
NCU01388	gene7504	0.0894133
NCU01981	gene450	0.0895244
NCU09249	gene2395	0.0895505
NCU01913	gene522	0.0897652
NCU11222	gene3276	0.0899115
NCU08093	gene63	0.0899148
NCU05543	gene8623	0.0902166
NCU07824	gene3757	0.090259
NCU03095	gene1064	0.0903562
NCU04426	gene5796	0.0905499
NCU01401	gene7519	0.0905764
NCU06921	gene9467	0.0905894
NCU04572	gene6857	0.090604
NCU02635	gene789	0.0906292
NCU09879	gene1547	0.0908704
NCU04002	gene8846	0.0912473
NCU01700	gene3128	0.0912921
NCU06674	gene7589	0.0914164
NCU07548	gene4659	0.0917629
NCU09819	gene986	0.0919479
NCU05273	gene6370	0.0920754
NCU01016	gene7134	0.092347
NCU00488	gene4560	0.0924437
NCU03436	gene2662	0.0924585
NCU01235	gene7349	0.092916
NCU03774	gene7044	0.0929447
NCU07893	gene5253	0.0930518
NCU07957	gene5183	0.0931674
NCU01341	gene7458	0.0931942
NCU09192	gene1410	0.093221
NCU06563	gene5310	0.0932345
NCU01277	gene7389	0.0933375
NCU11251	gene1167	0.0934834
NCU06649	gene7562	0.0938604
NCU05513	gene8659	0.0938932
NCU01523	gene3271	0.0941827
NCU09779	gene8472	0.0944037
NCU02803	gene2328	0.0946038
NCU08036	gene5965	0.0947192
NCU02620	gene774	0.0947252
NCU03099	gene1068	0.0951076
NCU02615	gene769	0.0951454
NCU02753	gene909	0.0954548
NCU03300	gene1273	0.0956213
NCU02670	gene823	0.0956609
NCU03261	gene1231	0.0957933
NCU01184	gene7294	0.0959285
NCU03039	gene2101	0.0959671
NCU01255	gene7366	0.0960905
NCU01512	gene3283	0.0961216
NCU02572	gene726	0.096188
NCU04082	gene8927	0.0964142
NCU02113	gene307	0.0965274
NCU07290	gene6106	0.0965744
NCU09537	gene7668	0.0966484
NCU06145	gene9716	0.0967336
NCU07552	gene4655	0.0968639
NCU04124	gene7776	0.0969352
NCU05797	gene10285	0.0972148
NCU04759	gene8376	0.0972311
NCU03138	gene1106	0.0983412
NCU07719	gene5425	0.0983452
NCU01767	gene3082	0.0983716
NCU06776	gene2950	0.0985097
NCU01489	gene3303	0.0985939
NCU03859	gene8714	0.0987308
NCU03037	gene2103	0.0989252
NCU09001	gene4604	0.0990334
NCU04345	gene5886	0.0990916
NCU10618	gene6828	0.0991821
NCU03537	gene2560	0.0992638
NCU00662	gene1914	0.0993224
NCU03435	gene2663	0.0995388
NCU03124	gene1092	0.0997923
NCU09014	gene4619	0.0999774
NCU05979	gene8987	0.100032
NCU11174	gene4278	0.10017
NCU03504	gene2591	0.100255
NCU02054	gene375	0.100672
NCU08505	gene3332	0.100691
NCU01564	gene3232	0.101057
NCU07683	gene5466	0.10125
NCU04114	gene7766	0.101413
NCU09319	gene1007	0.101418
NCU00411	gene4487	0.101686
NCU04051	gene8895	0.10183
NCU01276	gene7388	0.101943
NCU02367	gene9950	0.102057
NCU03627	gene6913	0.102362
NCU00209	gene4275	0.102656
NCU02379	gene9937	0.102682
NCU09813	gene978	0.102837
NCU02780	gene2355	0.102908
NCU08811	gene6288	0.103035
NCU01229	gene7344	0.10345
NCU01525	gene3269	0.103689
NCU09436	gene9313	0.103968
NCU01806	gene3037	0.104104
NCU08989	gene4590	0.104171
NCU01918	gene518	0.104469
NCU09744	gene5390	0.104513
NCU07878	gene3813	0.104562
NCU03557	gene2539	0.104647
NCU06463	gene3891	0.104969
NCU00577	gene1998	0.104972
NCU00649	gene1926	0.105099
NCU09609	gene2496	0.105115
NCU06544	gene5293	0.105499
NCU03924	gene8770	0.105622
NCU09871	gene8697	0.106094
NCU03855	gene8710	0.106523
NCU08506	gene3331	0.106619
NCU01601	gene3202	0.1068
NCU04121	gene7773	0.106834
NCU02508	gene653	0.106876
NCU01614	gene3193	0.106938
NCU08983	gene4584	0.106979
NCU01178	gene7287	0.107031
NCU01515	gene3281	0.107093
NCU06347	gene5614	0.107493
NCU00091	gene4151	0.107643
NCU08348	gene1391	0.107804
NCU03155	gene1123	0.107945
NCU01183	gene7293	0.108103
NCU02961	gene2174	0.108451
NCU07294	gene6102	0.108581
NCU09128	gene1325	0.108641
NCU01164	gene7272	0.10885
NCU02808	gene2323	0.10892
NCU03800	gene7070	0.109019
NCU03632	gene6918	0.109102
NCU03062	gene1029	0.109228
NCU05272	gene6371	0.109313
NCU00444	gene4519	0.109474
NCU01198	gene7310	0.109573
NCU00664	gene1911	0.109616
NCU03625	gene6911	0.109695
NCU08941	gene8002	0.109741
NCU06883	gene9423	0.109814
NCU01975	gene457	0.10984
NCU09721	gene9617	0.109932
NCU06855	gene2881	0.110214
NCU03769	gene7040	0.110397
NCU01974	gene458	0.11065
NCU02156	gene261	0.111089
NCU07793	gene6565	0.111249
NCU01644	gene3171	0.111285
NCU08024	gene5953	0.111365
NCU02532	gene681	0.111878
NCU04784	gene8405	0.11226
NCU09065	gene183	0.112466
NCU09461	gene3538	0.112583
NCU03858	gene8713	0.112705
NCU02277	gene10055	0.112945
NCU03178	gene1147	0.113202
NCU04173	gene7828	0.113361
NCU10388	gene3324	0.113387
NCU08317	gene5510	0.113509
NCU07535	gene4674	0.113856
NCU03990	gene8836	0.114124
NCU09736	gene5399	0.114168
NCU08340	gene1399	0.114179
NCU02555	gene707	0.114206
NCU03041	gene2099	0.114257
NCU08218	gene4727	0.114459
NCU08034	gene5963	0.114489
NCU00133	gene4197	0.114571
NCU00066	gene4123	0.114611
NCU06568	gene5316	0.114758
NCU03085	gene1052	0.11503
NCU06922	gene9468	0.115171
NCU01930	gene503	0.115287
NCU06929	gene9476	0.115302
NCU01665	gene3152	0.115426
NCU07069	gene8269	0.115432
NCU07299	gene6097	0.115563
NCU09300	gene9266	0.115573
NCU03837	gene7106	0.115589
NCU01738	gene3108	0.115636
NCU07998	gene5924	0.115726
NCU07554	gene4651	0.115803
NCU07364	gene1513	0.115891
NCU04017	gene8861	0.115896
NCU02563	gene716	0.115958
NCU00075	gene4133	0.116123
NCU00466	gene4540	0.116414
NCU09688	gene6709	0.116445
NCU05587	gene8574	0.116483
NCU01344	gene7461	0.116668
NCU06447	gene3875	0.116923
NCU02728	gene883	0.117251
NCU03716	gene6992	0.117332
NCU02219	gene10114	0.117527
NCU03366	gene2735	0.117771
NCU03899	gene8753	0.117855
NCU10927	gene5984	0.118007
NCU09727	gene5409	0.118103
NCU04242	gene7892	0.118109
NCU05433	gene2848	0.118153
NCU00334	gene4409	0.118157
NCU01249	gene7361	0.118218
NCU08354	gene1384	0.118271
NCU10292	gene6508	0.118592
NCU06854	gene2882	0.118601
NCU02565	gene718	0.118647
NCU06394	gene5569	0.118766
NCU03622	gene6908	0.118767
NCU07984	gene5907	0.118855
NCU00523	gene2057	0.11902
NCU00564	gene2014	0.119174
NCU04080	gene8925	0.119293
NCU02634	gene788	0.119387
NCU02267	gene10065	0.119426
NCU04535	gene9673	0.119437
NCU01724	gene3116	0.119465
NCU04198	gene7852	0.119569
NCU04600	gene6825	0.119675
NCU02695	gene851	0.119705
NCU04136	gene7791	0.120459
NCU03954	gene8796	0.120596
NCU08012	gene5939	0.120679
NCU06684	gene7599	0.120711
NCU04320	gene7967	0.120744
NCU08706	gene3387	0.120842
NCU08877	gene6507	0.120878
NCU03238	gene1210	0.120977
NCU00772	gene1801	0.12118
NCU08962	gene8025	0.121311
NCU03778	gene7048	0.121427
NCU04402	gene5823	0.121643
NCU02631	gene785	0.121724
NCU03588	gene6878	0.121754
NCU02006	gene424	0.121761
NCU06750	gene2977	0.121817
NCU00737	gene1838	0.12187
NCU04275	gene7920	0.121895
NCU09381	gene925	0.121909
NCU03460	gene2643	0.122158
NCU05117	gene9120	0.122214
NCU03485	gene2611	0.12225
NCU09370	gene936	0.122378
NCU03726	gene6999	0.122402
NCU01371	gene7488	0.122455
NCU01762	gene3087	0.12266
NCU01795	gene3049	0.122671
NCU01929	gene504	0.122934
NCU08339	gene1400	0.123044
NCU04335	gene5896	0.123281
NCU02588	gene741	0.123497
NCU01954	gene480	0.123555
NCU00159	gene4222	0.123675
NCU11427	gene2995	0.12406
NCU04595	gene6830	0.124187
NCU03260	gene1229	0.124191
NCU04317	gene7963	0.124305
NCU07330	gene6057	0.124344
NCU01101	gene7215	0.125002
NCU09006	gene4609	0.12508
NCU03804	gene7074	0.125763
NCU09745	gene5388	0.126024
NCU00920	gene1643	0.126379
NCU02000	gene430	0.126475
NCU03884	gene8736	0.126669
NCU07320	gene6070	0.126862
NCU02387	gene9929	0.126919
NCU09551	gene7683	0.126977
NCU06309	gene5653	0.127015
NCU03946	gene8789	0.127024
NCU06617	gene5367	0.127059
NCU02078	gene350	0.127349
NCU00964	gene1591	0.127518
NCU02152	gene266	0.127765
NCU03892	gene8746	0.12779
NCU07699	gene5446	0.12797
NCU03296	gene1268	0.128272
NCU03807	gene7077	0.128544
NCU03658	gene6943	0.128794
NCU00467	gene4541	0.128794
NCU01389	gene7505	0.128912
NCU00436	gene4511	0.129007
NCU03114	gene1083	0.129042
NCU05714	gene3726	0.129143
NCU05296	gene6346	0.129268
NCU07403	gene1477	0.129583
NCU00528	gene2052	0.12959
NCU02388	gene9928	0.129665
NCU06228	gene4004	0.129801
NCU01792	gene3054	0.129816
NCU08485	gene3349	0.129838
NCU08514	gene3320	0.129845
NCU04182	gene7838	0.130024
NCU03212	gene1182	0.130058
NCU06941	gene9490	0.130128
NCU02467	gene611	0.130217
NCU02696	gene852	0.130324
NCU02585	gene738	0.130402
NCU01991	gene440	0.130502
NCU06748	gene2979	0.130616
NCU00667	gene1908	0.130758
NCU05991	gene8975	0.130758
NCU08362	gene1374	0.130846
NCU06767	gene2960	0.130898
NCU02434	gene9879	0.130972
NCU03662	gene6947	0.13099
NCU00167	gene4231	0.131008
NCU02012	gene418	0.131097
NCU11410	gene9269	0.131432
NCU01005	gene7123	0.131485
NCU10715	gene9770	0.131505
NCU11357	gene3709	0.131542
NCU03483	gene2613	0.131584
NCU01936	gene496	0.131717
NCU00476	gene4550	0.131757
NCU10169	gene4595	0.131846
NCU02578	gene732	0.131966
NCU06049	gene9822	0.131994
NCU06397	gene5565	0.132001
NCU06497	gene3929	0.132189
NCU04009	gene8852	0.132237
NCU00690	gene1887	0.132513
NCU03833	gene7102	0.132561
NCU05274	gene6369	0.132571
NCU02223	gene10110	0.132644
NCU00504	gene2074	0.132913
NCU04152	gene7807	0.13298
NCU02970	gene2165	0.133114
NCU03461	gene2642	0.133225
NCU03265	gene1234	0.133286
NCU02737	gene892	0.133369
NCU06473	gene3900	0.133563
NCU09880	gene1545	0.133585
NCU00453	gene4528	0.133667
NCU09130	gene1327	0.133685
NCU04585	gene6844	0.133694
NCU09111	gene1305	0.133699
NCU07260	gene6135	0.133802
NCU02230	gene10103	0.134028
NCU08301	gene5524	0.134105
NCU06859	gene9397	0.134226
NCU00396	gene4472	0.134602
NCU02706	gene862	0.134623
NCU09982	gene606	0.134839
NCU05645	gene8509	0.135219
NCU03135	gene1103	0.135266
NCU03397	gene2706	0.135295
NCU00560	gene2018	0.135334
NCU07655	gene5020	0.135451
NCU00592	gene1983	0.135755
NCU02229	gene10104	0.135861
NCU02498	gene643	0.136077
NCU09814	gene980	0.1364
NCU04511	gene5696	0.136438
NCU08959	gene8020	0.136442
NCU02048	gene382	0.13686
NCU00998	gene7116	0.136933
NCU04640	gene6778	0.136974
NCU09008	gene4611	0.13698
NCU07674	gene5479	0.13705
NCU03579	gene2517	0.137064
NCU03525	gene2572	0.137064
NCU06491	gene3922	0.137253
NCU03100	gene1069	0.137435
NCU05588	gene8573	0.137465
NCU02839	gene2302	0.137504
NCU06393	gene5570	0.137522
NCU03147	gene1114	0.137533
NCU09808	gene973	0.137641
NCU01150	gene7256	0.137725
NCU01306	gene7421	0.137777
NCU06213	gene3988	0.137848
NCU05279	gene6363	0.13789
NCU03610	gene6898	0.138121
NCU02676	gene831	0.138285
NCU11085	gene2155	0.138438
NCU05295	gene6347	0.138457
NCU02984	gene2152	0.138527
NCU00465	gene4539	0.138615
NCU00593	gene1982	0.13864
NCU03047	gene2089	0.138643
NCU02082	gene344	0.13872
NCU06979	gene6174	0.138752
NCU04405	gene5819	0.138826
NCU06363	gene5598	0.138888
NCU09119	gene1315	0.139083
NCU01799	gene3044	0.139196
NCU03536	gene2561	0.139202
NCU06556	gene5304	0.139223
NCU04328	gene7975	0.139257
NCU06238	gene4015	0.139263
NCU07734	gene5411	0.139276
NCU05210	gene6436	0.13946
NCU03766	gene7037	0.139477
NCU03217	gene1187	0.139558
NCU00926	gene1634	0.13957
NCU09825	gene6630	0.13971
NCU09311	gene1015	0.139748
NCU04189	gene7842	0.139751
NCU00657	gene1918	0.139833
NCU10853	gene5168	0.139876
NCU06787	gene2939	0.140007
NCU08787	gene4855	0.140029
NCU06742	gene2986	0.140357
NCU07435	gene170	0.140586
NCU04423	gene5800	0.140654
NCU02473	gene616	0.140833
NCU06411	gene3834	0.140872
NCU02375	gene9941	0.140876
NCU03226	gene1197	0.140886
NCU02359	gene9958	0.140998
NCU00273	gene4345	0.14101
NCU09709	gene9631	0.141025
NCU05302	gene6340	0.141055
NCU03482	gene2614	0.141372
NCU05642	gene8512	0.141381
NCU03115	gene1084	0.14142
NCU09056	gene9388	0.141504
NCU02372	gene9944	0.141683
NCU01490	gene3302	0.141766
NCU08946	gene8007	0.141768
NCU08652	gene6029	0.141833
NCU02428	gene9885	0.142416
NCU02423	gene9888	0.142517
NCU06495	gene3927	0.14256
NCU00502	gene2076	0.142624
NCU06839	gene2899	0.142674
NCU00137	gene4203	0.142721
NCU02693	gene849	0.142814
NCU05772	gene10257	0.142844
NCU06958	gene6149	0.142854
NCU02743	gene898	0.142884
NCU09877	gene1549	0.142904
NCU06446	gene3874	0.142933
NCU06035	gene9836	0.142957
NCU01433	gene7740	0.14298
NCU07886	gene3821	0.14332
NCU03572	gene2524	0.1434
NCU02011	gene419	0.143458
NCU06695	gene7610	0.143648
NCU04813	gene8436	0.143689
NCU11173	gene4229	0.143689
NCU06176	gene3949	0.143698
NCU03980	gene8824	0.143946
NCU09546	gene7678	0.143979
NCU02830	gene2307	0.144112
NCU06369	gene5592	0.14415
NCU04098	gene7750	0.144208
NCU05622	gene8535	0.144289
NCU08423	gene3457	0.144437
NCU09608	gene2497	0.144548
NCU07400	gene1480	0.144796
NCU01443	gene7727	0.144933
NCU04247	gene7897	0.145237
NCU04387	gene5840	0.145462
NCU07724	gene5420	0.145516
NCU09291	gene9279	0.145768
NCU05517	gene8654	0.145851
NCU08161	gene10192	0.146025
NCU09512	gene3591	0.146259
NCU02520	gene668	0.146316
NCU03232	gene1205	0.14654
NCU03816	gene7086	0.146606
NCU08840	gene6255	0.146674
NCU01143	gene7249	0.146678
NCU00095	gene4155	0.146763
NCU03278	gene1246	0.146846
NCU01932	gene500	0.146918
NCU07988	gene5911	0.147325
NCU03341	gene2761	0.147411
NCU03216	gene1186	0.147495
NCU06472	gene3899	0.147517
NCU06611	gene5360	0.147816
NCU07866	gene3800	0.147834
NCU01831	gene3011	0.147867
NCU03836	gene7105	0.147894
NCU04611	gene6812	0.147947
NCU00628	gene1946	0.148354
NCU07936	gene5206	0.148439
NCU02168	gene249	0.148494
NCU08302	gene5523	0.14906
NCU01119	gene7232	0.149084
NCU03822	gene7092	0.149214
NCU03690	gene6965	0.14939
NCU02940	gene2196	0.149666
NCU03695	gene6970	0.149668
NCU03825	gene7095	0.149736
NCU03344	gene2758	0.149822
NCU02218	gene10115	0.149824
NCU01527	gene3267	0.149872
NCU04302	gene7949	0.149903
NCU02951	gene2185	0.149954
NCU04131	gene7786	0.150002
NCU05222	gene6423	0.150088
NCU02055	gene374	0.150117
NCU03042	gene2098	0.150184
NCU09699	gene9646	0.1504
NCU11369	gene5469	0.150425
NCU02024	gene406	0.150625
NCU08289	gene5536	0.150699
NCU04448	gene5774	0.150833
NCU01817	gene3026	0.150908
NCU02742	gene897	0.151055
NCU05120	gene9117	0.151165
NCU00412	gene4488	0.151225
NCU01920	gene516	0.151362
NCU00172	gene4236	0.151531
NCU02973	gene2163	0.151533
NCU01549	gene3245	0.151685
NCU06760	gene2967	0.151811
NCU09500	gene3604	0.151866
NCU04104	gene7756	0.152028
NCU02207	gene10127	0.152039
NCU05944	gene9031	0.152179
NCU02104	gene316	0.152232
NCU06489	gene3920	0.152232
NCU07567	gene4636	0.152253
NCU02241	gene10092	0.152719
NCU01177	gene7286	0.152723
NCU09438	gene9315	0.152728
NCU03081	gene1047	0.15273
NCU04139	gene7794	0.15274
NCU05253	gene6390	0.152751
NCU03883	gene8735	0.152778
NCU06739	gene2989	0.152784
NCU05796	gene10284	0.152828
NCU00578	gene1997	0.152892
NCU01370	gene7487	0.153034
NCU01962	gene470	0.153134
NCU06212	gene3987	0.153197
NCU08730	gene3411	0.153209
NCU09901	gene1	0.153441
NCU09121	gene1317	0.153508
NCU02264	gene10067	0.153606
NCU01657	gene3158	0.153617
NCU06866	gene9406	0.153687
NCU02965	gene2170	0.153804
NCU03338	gene2764	0.15394
NCU07015	gene6212	0.153942
NCU07717	gene5427	0.154108
NCU07874	gene3808	0.154456
NCU02577	gene731	0.154604
NCU01160	gene7268	0.154668
NCU09142	gene1339	0.154686
NCU02974	gene2162	0.155051
NCU03130	gene1098	0.15508
NCU06959	gene6150	0.155157
NCU03245	gene1218	0.15519
NCU03597	gene6885	0.155289
NCU02680	gene835	0.155318
NCU06488	gene6651	0.155559
NCU04164	gene7818	0.155583
NCU08563	gene4798	0.155663
NCU02602	gene756	0.155989
NCU03096	gene1065	0.156156
NCU06198	gene3973	0.15622
NCU00170	gene4234	0.156233
NCU03827	gene7097	0.156358
NCU02749	gene905	0.156388
NCU00536	gene2044	0.156413
NCU03401	gene2702	0.156497
NCU01967	gene465	0.156589
NCU01625	gene3188	0.156602
NCU03602	gene6891	0.156623
NCU07654	gene5019	0.156688
NCU04944	gene5136	0.156703
NCU03543	gene2554	0.156757
NCU07975	gene5899	0.156844
NCU06440	gene3869	0.15685
NCU01673	gene3145	0.156867
NCU06194	gene3968	0.156881
NCU01455	gene7715	0.157052
NCU06678	gene7593	0.157061
NCU01175	gene7284	0.157723
NCU02559	gene712	0.157725
NCU10029	gene2474	0.157805
NCU04149	gene7804	0.157828
NCU09722	gene9616	0.157887
NCU07580	gene4623	0.158
NCU01843	gene3000	0.158091
NCU08026	gene5955	0.158189
NCU07246	gene8080	0.158357
NCU09222	gene1444	0.158363
NCU08993	gene4596	0.158373
NCU07571	gene4632	0.158403
NCU04407	gene5817	0.158462
NCU06540	gene5289	0.1585
NCU01761	gene3088	0.15858
NCU01323	gene7439	0.158736
NCU03838	gene7107	0.159076
NCU07544	gene4663	0.159145
NCU01702	gene3126	0.159189
NCU00422	gene4499	0.159199
NCU00923	gene1637	0.159254
NCU00823	gene1746	0.159498
NCU00913	gene1650	0.159544
NCU00614	gene1962	0.159645
NCU03059	gene1026	0.159682
NCU01501	gene3292	0.159697
NCU00930	gene1629	0.15973
NCU03752	gene7023	0.159772
NCU11345	gene6211	0.159854
NCU08609	gene2434	0.159922
NCU09290	gene9280	0.159958
NCU08395	gene9552	0.160038
NCU03558	gene2538	0.160308
NCU06278	gene4059	0.160576
NCU09388	gene919	0.160595
NCU04003	gene8847	0.160757
NCU07437	gene168	0.160858
NCU00164	gene8727	0.160909
NCU04724	gene8335	0.161017
NCU09076	gene194	0.161063
NCU03410	gene2692	0.161088
NCU07171	gene8159	0.161103
NCU07265	gene6130	0.161176
NCU09309	gene1017	0.161342
NCU03381	gene2720	0.161422
NCU01192	gene7303	0.161492
NCU01807	gene3036	0.161524
NCU08484	gene3350	0.16167
NCU09657	gene4929	0.161706
NCU00568	gene2009	0.161723
NCU07505	gene100	0.161738
NCU03708	gene6984	0.161796
NCU07542	gene4665	0.161861
NCU02407	gene9906	0.161891
NCU09466	gene3544	0.162216
NCU09118	gene1314	0.162282
NCU08006	gene5933	0.162321
NCU00107	gene4167	0.162379
NCU10810	gene1270	0.16239
NCU08357	gene1381	0.162578
NCU05459	gene2859	0.162622
NCU08003	gene5929	0.162624
NCU06602	gene5351	0.162706
NCU09594	gene2512	0.162945
NCU02968	gene2167	0.162973
NCU00714	gene1864	0.163029
NCU10273	gene5993	0.163079
NCU04007	gene8850	0.163151
NCU05802	gene10291	0.163233
NCU04495	gene5713	0.163268
NCU02784	gene2350	0.163312
NCU02666	gene819	0.163461
NCU02687	gene843	0.163468
NCU01141	gene7247	0.163511
NCU02548	gene699	0.163627
NCU03340	gene2762	0.163643
NCU07700	gene5445	0.163672
NCU02564	gene717	0.163705
NCU06243	gene4019	0.163795
NCU05941	gene9034	0.163826
NCU00157	gene4220	0.163842
NCU02064	gene365	0.163945
NCU05809	gene10297	0.163969
NCU01366	gene7483	0.163984
NCU02016	gene414	0.164035
NCU04288	gene7935	0.16441
NCU05200	gene6446	0.164411
NCU06267	gene4046	0.164481
NCU00956	gene1599	0.164584
NCU04463	gene5758	0.164763
NCU06445	gene3873	0.164807
NCU03527	gene2570	0.164847
NCU06200	gene3976	0.164853
NCU00089	gene4149	0.165052
NCU08134	gene10164	0.16514
NCU05943	gene9032	0.165141
NCU08510	gene3327	0.165248
NCU00158	gene4221	0.165313
NCU03191	gene1161	0.165442
NCU09516	gene3588	0.165494
NCU06588	gene5338	0.165673
NCU02063	gene366	0.165714
NCU04116	gene7768	0.165876
NCU02105	gene315	0.165939
NCU01368	gene7485	0.166063
NCU05007	gene9240	0.166098
NCU06654	gene7567	0.166114
NCU04259	gene7905	0.166341
NCU04414	gene5810	0.166506
NCU05607	gene8552	0.166522
NCU06067	gene9799	0.166624
NCU03101	gene1070	0.166668
NCU03239	gene1211	0.166903
NCU03304	gene1278	0.166941
NCU03713	gene6989	0.167151
NCU08869	gene6516	0.167193
NCU07735	gene5410	0.167521
NCU08928	gene7989	0.167697
NCU01858	gene580	0.167741
NCU02007	gene423	0.167807
NCU02840	gene2301	0.168104
NCU04617	gene6804	0.168212
NCU08874	gene6511	0.168238
NCU00199	gene4263	0.168343
NCU03502	gene2593	0.168497
NCU09700	gene9644	0.168544
NCU08633	gene2459	0.168744
NCU02561	gene714	0.168766
NCU07688	gene5458	0.168778
NCU03231	gene1204	0.169078
NCU08985	gene4586	0.169094
NCU10776	gene10043	0.169103
NCU02963	gene2172	0.169228
NCU07313	gene6080	0.169267
NCU05389	gene2818	0.169319
NCU09442	gene9320	0.169564
NCU09191	gene1409	0.169695
NCU01167	gene7275	0.169808
NCU05635	gene8519	0.169947
NCU09331	gene993	0.169974
NCU06403	gene5559	0.17005
NCU09995	gene950	0.170064
NCU08992	gene4594	0.170156
NCU09123	gene1319	0.170226
NCU00951	gene1604	0.170297
NCU03407	gene2696	0.170365
NCU09070	gene187	0.170502
NCU01804	gene3039	0.170543
NCU07987	gene5910	0.17074
NCU06696	gene7611	0.17076
NCU06702	gene7618	0.170968
NCU01543	gene3251	0.171012
NCU03953	gene8795	0.171116
NCU09077	gene195	0.171125
NCU02437	gene9875	0.171349
NCU00134	gene4198	0.171366
NCU03159	gene1127	0.171586
NCU06741	gene2987	0.171639
NCU06052	gene9819	0.171773
NCU04313	gene7959	0.171804
NCU01674	gene3144	0.171897
NCU05927	gene9050	0.172033
NCU01796	gene3048	0.172081
NCU07904	gene5240	0.17218
NCU01999	gene431	0.172185
NCU02438	gene9873	0.172269
NCU02536	gene685	0.172332
NCU04100	gene7752	0.172427
NCU07367	gene1510	0.172443
NCU00624	gene1953	0.172443
NCU02149	gene269	0.172666
NCU05982	gene8984	0.172901
NCU04578	gene6851	0.173229
NCU00483	gene4555	0.173333
NCU01100	gene7214	0.173432
NCU08005	gene5931	0.173754
NCU03606	gene6895	0.173833
NCU09842	gene8042	0.173888
NCU03309	gene1283	0.174154
NCU04606	gene6818	0.174381
NCU07010	gene6206	0.174557
NCU02505	gene651	0.174783
NCU04429	gene5793	0.175101
NCU00019	gene4076	0.175321
NCU07859	gene3792	0.175587
NCU06659	gene7573	0.175634
NCU03258	gene1228	0.175701
NCU02354	gene9963	0.175709
NCU04035	gene8878	0.175809
NCU06769	gene2958	0.175847
NCU11322	gene5273	0.175851
NCU01438	gene7734	0.176211
NCU05715	gene3727	0.176271
NCU07761	gene6598	0.176274
NCU12112	gene8833	0.176296
NCU03972	gene8814	0.176363
NCU02014	gene416	0.176686
NCU09644	gene4914	0.176745
NCU07297	gene6099	0.17713
NCU07188	gene8140	0.177405
NCU06623	gene5373	0.177469
NCU03517	gene2577	0.17749
NCU08981	gene4582	0.177665
NCU04652	gene6765	0.178217
NCU03910	gene8762	0.178286
NCU07282	gene6114	0.178416
NCU10519	gene8361	0.178433
NCU00799	gene1773	0.178633
NCU00198	gene4262	0.178636
NCU08029	gene5958	0.178665
NCU01466	gene7704	0.178669
NCU02203	gene10131	0.178807
NCU01695	gene3133	0.179014
NCU05305	gene6337	0.1793
NCU04115	gene7767	0.179345
NCU04176	gene7831	0.179578
NCU09106	gene9338	0.179791
NCU08708	gene3389	0.179834
NCU07872	gene3807	0.179854
NCU07556	gene7523	0.180064
NCU05816	gene10303	0.180182
NCU09576	gene9525	0.18019
NCU01547	gene3247	0.180315
NCU09803	gene968	0.180367
NCU00736	gene1839	0.180518
NCU08894	gene6682	0.1806
NCU01467	gene7703	0.180774
NCU10044	gene1453	0.180822
NCU01019	gene7136	0.18095
NCU01499	gene3294	0.181025
NCU04558	gene9649	0.181082
NCU02510	gene655	0.181186
NCU09294	gene9274	0.181271
NCU01822	gene3019	0.181489
NCU02935	gene2201	0.181511
NCU01779	gene3073	0.181675
NCU06578	gene5328	0.181715
NCU10048	gene9000	0.18174
NCU09025	gene9354	0.181985
NCU02044	gene384	0.182062
NCU08046	gene5977	0.182383
NCU06344	gene5617	0.182399
NCU03065	gene1032	0.182483
NCU07692	gene5454	0.182618
NCU03223	gene1193	0.182674
NCU08511	gene3325	0.182742
NCU00527	gene2053	0.182878
NCU01047	gene7157	0.183317
NCU06870	gene9411	0.183525
NCU08936	gene7997	0.183733
NCU03359	gene2743	0.184096
NCU06801	gene2928	0.184246
NCU08111	gene82	0.18434
NCU11399	gene4593	0.184366
NCU08666	gene6015	0.184434
NCU02162	gene255	0.184438
NCU02621	gene775	0.184445
NCU06722	gene7642	0.184475
NCU00395	gene4471	0.184787
NCU01939	gene493	0.184834
NCU05457	gene2856	0.184867
NCU05198	gene6448	0.185036
NCU02842	gene2299	0.185041
NCU04927	gene5117	0.185099
NCU02736	gene891	0.185389
NCU00518	gene2063	0.185473
NCU02658	gene811	0.185483
NCU02962	gene2173	0.185744
NCU05270	gene6373	0.185814
NCU08638	gene2465	0.185862
NCU00622	gene1955	0.185914
NCU06880	gene9420	0.185955
NCU09730	gene5406	0.186028
NCU07844	gene3776	0.186277
NCU00548	gene2034	0.186279
NCU10376	gene2744	0.186334
NCU07852	gene3785	0.18649
NCU04319	gene7966	0.186778
NCU08550	gene4813	0.186932
NCU10311	gene9648	0.187059
NCU01007	gene7125	0.187434
NCU09205	gene1424	0.187443
NCU09079	gene197	0.187611
NCU09204	gene1423	0.187625
NCU04481	gene5734	0.187709
NCU09809	gene974	0.187732
NCU02272	gene10060	0.187743
NCU00359	gene4433	0.187772
NCU06764	gene2963	0.187843
NCU03538	gene2559	0.188081
NCU08604	gene2429	0.188127
NCU01580	gene3216	0.188178
NCU08279	gene5543	0.188241
NCU02937	gene2199	0.188313
NCU02982	gene2154	0.188338
NCU10747	gene9933	0.188401
NCU07832	gene3765	0.188427
NCU02076	gene352	0.188482
NCU04180	gene7836	0.188539
NCU05363	gene2796	0.188736
NCU01190	gene7301	0.188837
NCU02805	gene2326	0.188975
NCU03875	gene3919	0.189044
NCU09250	gene2394	0.189204
NCU06354	gene5606	0.189221
NCU06856	gene2880	0.189352
NCU05602	gene8557	0.189429
NCU00621	gene1956	0.189429
NCU01006	gene7124	0.189851
NCU00480	gene4553	0.189872
NCU00414	gene4491	0.19031
NCU04654	gene6763	0.190471
NCU09012	gene4617	0.190596
NCU10067	gene9968	0.190676
NCU09999	gene947	0.190701
NCU08664	gene6016	0.190863
NCU01469	gene7701	0.190992
NCU04344	gene5887	0.191226
NCU05664	gene3677	0.191503
NCU04166	gene7820	0.191541
NCU02472	gene615	0.19158
NCU01215	gene7330	0.191812
NCU09861	gene8941	0.191819
NCU03765	gene7036	0.191851
NCU01247	gene7359	0.191881
NCU00660	gene1915	0.191956
NCU09707	gene9633	0.191972
NCU08678	gene6003	0.191978
NCU08118	gene89	0.19202
NCU02364	gene9953	0.192098
NCU04580	gene6848	0.192301
NCU03928	gene8774	0.192465
NCU00366	gene4441	0.192528
NCU05856	gene10349	0.192603
NCU03975	gene8818	0.192826
NCU01460	gene7710	0.192829
NCU00693	gene1884	0.192853
NCU02123	gene295	0.1931
NCU01118	gene7231	0.193212
NCU06270	gene4049	0.193396
NCU09254	gene2390	0.193514
NCU02587	gene740	0.193551
NCU04461	gene5760	0.193678
NCU08456	gene3368	0.193752
NCU08651	gene6030	0.193947
NCU06676	gene7591	0.193964
NCU03555	gene2541	0.194126
NCU08004	gene5930	0.194164
NCU03718	gene6994	0.19418
NCU09723	gene9615	0.194202
NCU02997	gene2143	0.194206
NCU06718	gene7637	0.194313
NCU01307	gene7422	0.194393
NCU04333	gene7980	0.194627
NCU00424	gene4501	0.1947
NCU00087	gene4147	0.194719
NCU02231	gene10102	0.194825
NCU05286	gene6356	0.194886
NCU06441	gene3870	0.194943
NCU05418	gene2837	0.195183
NCU06832	gene2907	0.195383
NCU06103	gene9762	0.195395
NCU08385	gene1348	0.195488
NCU07574	gene4629	0.195565
NCU02419	gene9892	0.195894
NCU02404	gene9909	0.195937
NCU01116	gene7230	0.196207
NCU03759	gene7030	0.196212
NCU02248	gene10085	0.196259
NCU02435	gene9878	0.196517
NCU04308	gene7955	0.196744
NCU06717	gene7636	0.196987
NCU06101	gene9764	0.196991
NCU07436	gene169	0.197122
NCU10225	gene10052	0.197353
NCU04790	gene8411	0.197401
NCU04174	gene7829	0.197418
NCU02228	gene10105	0.197556
NCU04321	gene7968	0.197561
NCU10061	gene8038	0.197561
NCU06712	gene7631	0.197578
NCU02810	gene2321	0.197775
NCU02013	gene417	0.198154
NCU02684	gene4227	0.19818
NCU04470	gene5748	0.198231
NCU11246	gene1263	0.198565
NCU06108	gene9757	0.198596
NCU06266	gene4045	0.198624
NCU01224	gene7341	0.198786
NCU06452	gene3880	0.198911
NCU08023	gene5952	0.198968
NCU02719	gene873	0.19898
NCU00505	gene2073	0.199008
NCU01191	gene7302	0.199343
NCU01902	gene533	0.199458
NCU00889	gene1672	0.199636
NCU06107	gene9758	0.199732
NCU02380	gene9936	0.199767
NCU07365	gene1512	0.200065
NCU09247	gene2397	0.200115
NCU09474	gene3552	0.200197
NCU03126	gene1094	0.200441
NCU06453	gene3881	0.200454
NCU07494	gene113	0.200459
NCU01705	gene3123	0.200533
NCU04534	gene9674	0.20083
NCU00950	gene1605	0.201008
NCU04516	gene5691	0.201426
NCU12046	gene9433	0.201427
NCU09237	gene2410	0.201467
NCU02595	gene749	0.201548
NCU04315	gene7961	0.201577
NCU06396	gene5566	0.20159
NCU05717	gene3729	0.20199
NCU09068	gene185	0.20232
NCU08388	gene1345	0.202332
NCU03763	gene7034	0.202438
NCU03809	gene7079	0.202617
NCU06021	gene9851	0.202636
NCU05942	gene9033	0.202703
NCU04750	gene8367	0.202716
NCU02402	gene9912	0.203091
NCU08468	gene3362	0.20311
NCU07721	gene5423	0.203209
NCU03387	gene2714	0.20323
NCU06928	gene9475	0.203496
NCU02685	gene841	0.203624
NCU00057	gene4114	0.203838
NCU03310	gene1284	0.204007
NCU02357	gene9960	0.204031
NCU08503	gene3334	0.204035
NCU03796	gene7066	0.204182
NCU02003	gene427	0.204265
NCU02374	gene9942	0.204884
NCU08504	gene3333	0.205022
NCU07414	gene1465	0.205159
NCU05116	gene9121	0.205214
NCU05075	gene9162	0.205381
NCU00070	gene4128	0.205596
NCU07996	gene5921	0.205761
NCU07733	gene5412	0.206296
NCU08353	gene1385	0.206347
NCU03638	gene6924	0.20644
NCU03088	gene1057	0.206521
NCU03154	gene1122	0.206646
NCU01919	gene517	0.206649
NCU02385	gene9931	0.206715
NCU02217	gene10116	0.206746
NCU05695	gene3706	0.206858
NCU00771	gene1802	0.207124
NCU04749	gene8366	0.20745
NCU02493	gene638	0.20755
NCU09143	gene1340	0.207691
NCU07460	gene145	0.207705
NCU08919	gene1300	0.2078
NCU08217	gene4726	0.207952
NCU01114	gene7228	0.208132
NCU00609	gene1967	0.208217
NCU03624	gene6910	0.208565
NCU01541	gene3255	0.2087
NCU01303	gene7418	0.208835
NCU02796	gene2336	0.208973
NCU00880	gene1683	0.208993
NCU06246	gene4022	0.209124
NCU04806	gene8427	0.209178
NCU00348	gene4421	0.209372
NCU00257	gene4327	0.209569
NCU05633	gene8522	0.209738
NCU02514	gene659	0.210238
NCU08068	gene36	0.210671
NCU04359	gene5869	0.210739
NCU01218	gene7334	0.210781
NCU07954	gene5185	0.210996
NCU05400	gene2827	0.211093
NCU03777	gene7047	0.21121
NCU08345	gene1394	0.211323
NCU04087	gene8933	0.211777
NCU02373	gene9943	0.211796
NCU03207	gene1177	0.211836
NCU03040	gene2100	0.21217
NCU03405	gene2698	0.21222
NCU06786	gene2940	0.212309
NCU02650	gene803	0.212695
NCU03874	gene8726	0.212945
NCU02678	gene833	0.213016
NCU02260	gene10071	0.213054
NCU01024	gene7140	0.213139
NCU06076	gene9788	0.213322
NCU07657	gene5022	0.213767
NCU10337	gene1027	0.213849
NCU10733	gene8414	0.214065
NCU01596	gene3206	0.214123
NCU09366	gene939	0.214182
NCU02115	gene304	0.21423
NCU07493	gene114	0.214242
NCU06462	gene3890	0.214414
NCU06863	gene9401	0.214886
NCU04788	gene8409	0.214962
NCU02247	gene10086	0.215239
NCU09561	gene9541	0.215316
NCU09482	gene3560	0.215863
NCU03948	gene8791	0.215925
NCU07451	gene155	0.216028
NCU05269	gene6374	0.216115
NCU12024	gene9645	0.216379
NCU09449	gene9327	0.21641
NCU02286	gene10045	0.216412
NCU01246	gene7358	0.216742
NCU11362	gene4965	0.217079
NCU09838	gene6646	0.217348
NCU06086	gene9776	0.217392
NCU01169	gene7278	0.217419
NCU04780	gene8401	0.218043
NCU06439	gene3868	0.218254
NCU01421	gene7541	0.21844
NCU02237	gene10096	0.218665
NCU08742	gene3425	0.219061
NCU00050	gene4106	0.219364
NCU03112	gene1081	0.21962
NCU00018	gene4075	0.220363
NCU04059	gene8901	0.220589
NCU01021	gene7137	0.221046
NCU06534	gene5282	0.221172
NCU00812	gene1755	0.221668
NCU09552	gene7684	0.221972
NCU00415	gene4492	0.222431
NCU11381	gene10170	0.222537
NCU03186	gene1156	0.222749
NCU05014	gene9232	0.222851
NCU03244	gene1217	0.222862
NCU02345	gene9975	0.223013
NCU03596	gene6884	0.223053
NCU00426	gene4503	0.223148
NCU07380	gene1499	0.223189
NCU03170	gene1138	0.223308
NCU05261	gene6383	0.223333
NCU04245	gene7895	0.223577
NCU09450	gene9328	0.223893
NCU06342	gene5619	0.223945
NCU06980	gene6175	0.22421
NCU04181	gene7837	0.224407
NCU00428	gene4505	0.224632
NCU10467	gene7408	0.224697
NCU00489	gene4266	0.224822
NCU03187	gene1157	0.225271
NCU00308	gene4383	0.225368
NCU05027	gene9216	0.225437
NCU06821	gene2914	0.225572
NCU08952	gene8012	0.226008
NCU01514	gene3282	0.226009
NCU00004	gene4062	0.226138
NCU06075	gene9789	0.226523
NCU04671	gene6745	0.226557
NCU06714	gene7633	0.226679
NCU08373	gene1361	0.227025
NCU05033	gene9208	0.227103
NCU06966	gene6158	0.227117
NCU00431	gene4507	0.227215
NCU09827	gene6632	0.227897
NCU03103	gene1072	0.227943
NCU05214	gene6432	0.228057
NCU00410	gene4486	0.228381
NCU02589	gene742	0.22841
NCU03399	gene2704	0.228469
NCU04549	gene9659	0.228897
NCU07858	gene3791	0.228953
NCU06038	gene9832	0.228965
NCU07319	gene6071	0.229031
NCU04764	gene8382	0.229087
NCU02414	gene9897	0.229177
NCU03653	gene6940	0.229333
NCU04304	gene7951	0.229503
NCU05921	gene9058	0.229621
NCU02224	gene10109	0.229763
NCU01330	gene7447	0.230356
NCU03964	gene8804	0.230521
NCU06894	gene9436	0.230636
NCU03268	gene1237	0.230928
NCU06968	gene6160	0.23119
NCU02108	gene312	0.231293
NCU08227	gene4736	0.231629
NCU04648	gene6769	0.231723
NCU02167	gene250	0.231725
NCU08809	gene6290	0.23175
NCU01008	gene7126	0.231893
NCU08032	gene5961	0.232016
NCU07658	gene5023	0.232109
NCU00882	gene1681	0.232174
NCU06648	gene7561	0.232206
NCU08920	gene6650	0.232686
NCU08795	gene4847	0.233312
NCU02748	gene904	0.233401
NCU00712	gene1866	0.233428
NCU06430	gene3859	0.233558
NCU05800	gene10288	0.233715
NCU01206	gene7318	0.233856
NCU06673	gene7587	0.233962
NCU04323	gene7970	0.234282
NCU09317	gene1009	0.234366
NCU07836	gene3768	0.234381
NCU05971	gene8996	0.234473
NCU06762	gene2965	0.234726
NCU03495	gene2600	0.23478
NCU06546	gene5294	0.234947
NCU04040	gene8883	0.235008
NCU03347	gene2754	0.235018
NCU08944	gene8005	0.235307
NCU09912	gene12	0.235308
NCU06993	gene6189	0.235574
NCU01878	gene557	0.235772
NCU00150	gene4213	0.235823
NCU05803	gene10292	0.236044
NCU06008	gene8957	0.236345
NCU05889	gene10384	0.236394
NCU08471	gene3359	0.236521
NCU00519	gene2062	0.236819
NCU04462	gene5759	0.236885
NCU05453	gene2854	0.237061
NCU03211	gene1181	0.237289
NCU06310	gene5652	0.23733
NCU02949	gene2187	0.237353
NCU01643	gene3172	0.238104
NCU06768	gene2959	0.238137
NCU01793	gene3051	0.238335
NCU09261	gene2383	0.238357
NCU08030	gene5959	0.238506
NCU07679	gene5475	0.238537
NCU02303	gene10026	0.238714
NCU10155	gene6840	0.239235
NCU09892	gene958	0.23935
NCU09017	gene4621	0.239457
NCU03692	gene6967	0.239516
NCU08007	gene5934	0.239967
NCU06149	gene9709	0.240104
NCU09539	gene7670	0.240138
NCU09503	gene3602	0.240175
NCU06542	gene5291	0.240246
NCU03792	gene7062	0.240453
NCU01023	gene7139	0.240488
NCU00389	gene4465	0.240778
NCU01440	gene7732	0.240945
NCU03814	gene7083	0.241094
NCU08940	gene8001	0.241099
NCU07021	gene6218	0.241272
NCU06054	gene9817	0.241319
NCU12023	gene9647	0.24164
NCU07831	gene3764	0.241893
NCU05219	gene6426	0.242204
NCU09239	gene2406	0.242324
NCU06279	gene4060	0.242591
NCU06701	gene7616	0.242606
NCU00472	gene4546	0.242762
NCU08071	gene39	0.24294
NCU05009	gene9238	0.242942
NCU03073	gene1039	0.243031
NCU01468	gene7702	0.243354
NCU06621	gene5371	0.243675
NCU07072	gene8266	0.243796
NCU04325	gene7972	0.243819
NCU06318	gene5644	0.243983
NCU00641	gene1934	0.244082
NCU08661	gene6020	0.24414
NCU01015	gene7133	0.245149
NCU06532	gene5278	0.245409
NCU03631	gene6917	0.245569
NCU04575	gene6854	0.245997
NCU00463	gene4537	0.246672
NCU05238	gene6405	0.246844
NCU00387	gene4462	0.247033
NCU01377	gene7494	0.247038
NCU06733	gene7656	0.247075
NCU00892	gene1668	0.247358
NCU09972	gene596	0.247406
NCU11030	gene4440	0.247421
NCU00959	gene1596	0.247522
NCU03225	gene1196	0.247583
NCU00193	gene4257	0.247946
NCU04279	gene7925	0.247979
NCU04810	gene8432	0.248036
NCU00980	gene1572	0.248291
NCU03877	gene8729	0.248442
NCU00605	gene1971	0.248688
NCU09227	gene1449	0.249074
NCU05605	gene8554	0.24914
NCU05211	gene6435	0.249198
NCU08268	gene5556	0.249285
NCU09371	gene935	0.249441
NCU01304	gene7419	0.249489
NCU02979	gene2157	0.249593
NCU08930	gene7991	0.249671
NCU01279	gene7392	0.249788
NCU08736	gene3418	0.249814
NCU04364	gene5865	0.250142
NCU02036	gene394	0.250385
NCU01642	gene3173	0.250588
NCU09969	gene8281	0.25067
NCU06307	gene5655	0.251641
NCU07725	gene5419	0.251815
NCU04827	gene8451	0.251818
NCU09092	gene210	0.251949
NCU02293	gene10036	0.252108
NCU09543	gene7674	0.252133
NCU04609	gene6814	0.252196
NCU00596	gene1979	0.253221
NCU07926	gene5218	0.253333
NCU09218	gene1440	0.253664
NCU06451	gene3879	0.254186
NCU00981	gene1571	0.254292
NCU02256	gene10075	0.254502
NCU09327	gene997	0.25463
NCU02664	gene817	0.254942
NCU06457	gene3886	0.255281
NCU02450	gene9870	0.255524
NCU00051	gene4107	0.256061
NCU09216	gene1438	0.256095
NCU06391	gene5571	0.256496
NCU07507	gene98	0.256893
NCU02813	gene2318	0.257037
NCU04775	gene8394	0.25712
NCU08158	gene10190	0.257335
NCU02280	gene10051	0.257787
NCU03876	gene8728	0.257909
NCU07870	gene3805	0.258781
NCU04380	gene5847	0.258949
NCU01610	gene3197	0.259727
NCU07782	gene6575	0.260055
NCU00276	gene4348	0.260339
NCU08806	gene6296	0.260399
NCU05430	gene2847	0.260482
NCU03824	gene7094	0.2607
NCU08888	gene6688	0.260737
NCU06249	gene4025	0.260979
NCU00635	gene1939	0.261
NCU04766	gene8385	0.26116
NCU07678	gene5476	0.261477
NCU03291	gene1261	0.2617
NCU03394	gene2709	0.262119
NCU03283	gene1252	0.262512
NCU01585	gene3213	0.262641
NCU03719	gene6995	0.262949
NCU02598	gene752	0.263095
NCU06970	gene6162	0.263159
NCU02731	gene886	0.263359
NCU06644	gene7557	0.263625
NCU08454	gene3370	0.26373
NCU04826	gene8450	0.264025
NCU00458	gene4533	0.264047
NCU08682	gene5999	0.264124
NCU01980	gene451	0.264362
NCU02090	gene333	0.26437
NCU00599	gene1976	0.264477
NCU06679	gene7594	0.26448
NCU03973	gene8815	0.264534
NCU00278	gene4350	0.264688
NCU04117	gene7769	0.264975
NCU03496	gene2599	0.266694
NCU03970	gene8812	0.266748
NCU03704	gene6979	0.267396
NCU07458	gene148	0.267619
NCU07492	gene115	0.267791
NCU02121	gene297	0.267975
NCU01997	gene433	0.268145
NCU00468	gene4542	0.268521
NCU03539	gene2558	0.268555
NCU01227	gene7343	0.268919
NCU09894	gene959	0.269077
NCU00194	gene4258	0.269138
NCU00542	gene2039	0.26925
NCU07697	gene5448	0.269326
NCU09754	gene3537	0.269499
NCU05129	gene9105	0.269501
NCU09658	gene4930	0.269563
NCU08931	gene7992	0.269956
NCU07576	gene4627	0.270177
NCU04449	gene5773	0.270412
NCU09257	gene2387	0.270494
NCU04105	gene7757	0.271335
NCU06539	gene5288	0.271553
NCU07419	gene1460	0.271916
NCU06845	gene2890	0.271993
NCU01553	gene3241	0.2721
NCU07885	gene3820	0.272525
NCU00570	gene2007	0.272991
NCU05196	gene6450	0.273452
NCU05981	gene8985	0.273458
NCU02570	gene724	0.273555
NCU00430	gene4506	0.274262
NCU05680	gene3693	0.274328
NCU01474	gene7695	0.274506
NCU01446	gene7724	0.274833
NCU00640	gene1935	0.275021
NCU07929	gene5215	0.275152
NCU07456	gene150	0.275836
NCU01550	gene3244	0.276268
NCU05076	gene9161	0.276474
NCU02315	gene10013	0.276501
NCU00074	gene4132	0.276501
NCU07057	gene8286	0.277042
NCU04404	gene5820	0.277099
NCU09826	gene6631	0.277252
NCU00065	gene4122	0.277313
NCU03791	gene7061	0.277574
NCU08947	gene8008	0.277752
NCU05300	gene6342	0.278363
NCU06389	gene5573	0.278871
NCU02542	gene693	0.279227
NCU07017	gene6214	0.279411
NCU00905	gene1655	0.279462
NCU04153	gene7808	0.279496
NCU07384	gene1494	0.279571
NCU02571	gene725	0.279896
NCU07959	gene5181	0.280014
NCU05608	gene8551	0.28027
NCU03195	gene1165	0.280478
NCU00038	gene4093	0.280541
NCU02632	gene786	0.280699
NCU02110	gene310	0.280706
NCU03367	gene2734	0.280835
NCU03230	gene1203	0.281106
NCU00775	gene1798	0.281466
NCU02052	gene377	0.281978
NCU08825	gene6271	0.28202
NCU02406	gene9907	0.282422
NCU04760	gene8377	0.283225
NCU01187	gene7297	0.283303
NCU07002	gene6199	0.28345
NCU05429	gene2846	0.283916
NCU00238	gene4308	0.28469
NCU08049	gene16	0.285024
NCU03139	gene1107	0.285035
NCU06478	gene3906	0.285347
NCU00894	gene1666	0.285377
NCU02182	gene229	0.285387
NCU00843	gene1725	0.28627
NCU06481	gene3909	0.286478
NCU03094	gene1063	0.286512
NCU04068	gene8910	0.286538
NCU07588	gene4944	0.286576
NCU03516	gene2578	0.286961
NCU07478	gene129	0.28705
NCU00957	gene1598	0.287446
NCU03061	gene1028	0.287461
NCU01454	gene7716	0.287583
NCU09616	gene2490	0.28827
NCU02499	gene644	0.288367
NCU01810	gene3033	0.288431
NCU07755	gene6605	0.289116
NCU03266	gene1235	0.289228
NCU08873	gene6512	0.28929
NCU03760	gene7031	0.289567
NCU00827	gene1742	0.289629
NCU09201	gene1420	0.289653
NCU07742	gene6619	0.289795
NCU09870	gene8698	0.289851
NCU02917	gene2221	0.290358
NCU03257	gene1227	0.290723
NCU01698	gene3130	0.290794
NCU08324	gene5503	0.290813
NCU06914	gene9458	0.290915
NCU00103	gene4163	0.290925
NCU02943	gene2193	0.291347
NCU04081	gene8926	0.291677
NCU00618	gene1959	0.292284
NCU08009	gene5936	0.292613
NCU07060	gene8283	0.292746
NCU00727	gene1847	0.292997
NCU07514	gene4698	0.293308
NCU11219	gene9217	0.293562
NCU08929	gene7990	0.29365
NCU04899	gene5084	0.294096
NCU06949	gene9500	0.294944
NCU03234	gene1207	0.295432
NCU04898	gene5083	0.295554
NCU01765	gene3084	0.295654
NCU01201	gene7313	0.295886
NCU02757	gene913	0.295909
NCU07355	gene1523	0.295966
NCU06482	gene3910	0.29661
NCU00404	gene4480	0.297094
NCU02539	gene690	0.29786
NCU00205	gene4270	0.297945
NCU06772	gene2956	0.298351
NCU05804	gene10293	0.298361
NCU00168	gene4232	0.298369
NCU06484	gene3913	0.298376
NCU09643	gene4913	0.298459
NCU04408	gene5816	0.298669
NCU07001	gene6198	0.299469
NCU01722	gene3117	0.299479
NCU05290	gene6352	0.299565
NCU04172	gene7826	0.299572
NCU06227	gene4003	0.299693
NCU01785	gene3066	0.299995
NCU02554	gene706	0.300007
NCU03274	gene1242	0.300011
NCU07972	gene5169	0.300154
NCU01485	gene3307	0.300374
NCU06464	gene3892	0.300653
NCU03194	gene1164	0.300701
NCU00161	gene4224	0.300958
NCU02305	gene10024	0.301613
NCU01473	gene7696	0.30167
NCU02651	gene804	0.302
NCU07442	gene163	0.302101
NCU00631	gene4649	0.302733
NCU04238	gene7889	0.303132
NCU00040	gene4096	0.303135
NCU03233	gene1206	0.303539
NCU02925	gene6550	0.303816
NCU03148	gene1115	0.304001
NCU03936	gene8781	0.304164
NCU09677	gene6723	0.304354
NCU08277	gene5546	0.304396
NCU07549	gene4658	0.304403
NCU06244	gene4020	0.304838
NCU05029	gene9214	0.305298
NCU04411	gene5813	0.305603
NCU03548	gene2549	0.306183
NCU05285	gene6357	0.306786
NCU00163	gene4226	0.307076
NCU01163	gene7271	0.307242
NCU05095	gene9141	0.307372
NCU07528	gene4683	0.307852
NCU07794	gene6564	0.307889
NCU10053	gene9544	0.308474
NCU09477	gene3555	0.308905
NCU08338	gene1401	0.309005
NCU00200	gene4264	0.309352
NCU04649	gene6768	0.309447
NCU09807	gene972	0.310119
NCU04418	gene5806	0.310732
NCU03630	gene6916	0.311309
NCU08022	gene5951	0.31155
NCU04454	gene5767	0.311978
NCU08964	gene8027	0.312044
NCU08997	gene4600	0.312139
NCU03575	gene2521	0.3124
NCU03826	gene7096	0.312541
NCU04015	gene8858	0.312903
NCU00261	gene4331	0.312974
NCU07187	gene8141	0.313449
NCU06424	gene3853	0.313542
NCU03659	gene6944	0.314746
NCU04602	gene6822	0.315037
NCU02208	gene10126	0.31552
NCU07851	gene3784	0.316111
NCU02057	gene372	0.316185
NCU01067	gene7179	0.316307
NCU01245	gene7357	0.316444
NCU05917	gene9062	0.317595
NCU06632	gene5382	0.317772
NCU11311	gene4001	0.317986
NCU05197	gene6449	0.318631
NCU07420	gene1459	0.318741
NCU03798	gene7068	0.319575
NCU01692	gene3134	0.319656
NCU00912	gene1651	0.32042
NCU04453	gene5768	0.320673
NCU07534	gene4675	0.321215
NCU04301	gene7948	0.321233
NCU08133	gene10163	0.321484
NCU03979	gene8823	0.32264
NCU01369	gene7486	0.323011
NCU00565	gene2013	0.323542
NCU00371	gene4446	0.323597
NCU03008	gene2135	0.323819
NCU05237	gene6406	0.324267
NCU08375	gene1359	0.324276
NCU01179	gene7288	0.324306
NCU03166	gene1134	0.324518
NCU00077	gene4135	0.32481
NCU00269	gene4341	0.324878
NCU06450	gene3878	0.325118
NCU11197	gene1588	0.325634
NCU05343	gene2783	0.32602
NCU06117	gene9749	0.326138
NCU05426	gene2844	0.326828
NCU06066	gene9800	0.327605
NCU04041	gene8884	0.327659
NCU02804	gene2327	0.328158
NCU05601	gene8558	0.328508
NCU10270	gene5764	0.328778
NCU09206	gene1425	0.328955
NCU07868	gene3802	0.329203
NCU08288	gene5537	0.330356
NCU01977	gene454	0.330482
NCU06141	gene9721	0.330554
NCU05813	gene10301	0.330681
NCU01613	gene3194	0.330699
NCU00768	gene1804	0.330864
NCU00676	gene1900	0.331068
NCU10893	gene2408	0.331276
NCU02726	gene881	0.333735
NCU05248	gene6396	0.333954
NCU07407	gene1472	0.334254
NCU06296	gene5665	0.334516
NCU02049	gene381	0.334743
NCU06099	gene9765	0.335075
NCU01283	gene7397	0.335118
NCU04312	gene7958	0.33555
NCU00279	gene4351	0.335762
NCU01772	gene3078	0.336291
NCU05989	gene8977	0.336641
NCU06168	gene9686	0.336858
NCU00584	gene1990	0.337322
NCU02605	gene759	0.337619
NCU06881	gene9421	0.33767
NCU08368	gene1366	0.338128
NCU04740	gene8355	0.338259
NCU03177	gene1146	0.338545
NCU03823	gene7093	0.338703
NCU09463	gene3540	0.339001
NCU04159	gene7813	0.339023
NCU04138	gene7793	0.339033
NCU01300	gene7415	0.339123
NCU00427	gene4504	0.339183
NCU03854	gene8709	0.339499
NCU01299	gene7414	0.339887
NCU02674	gene829	0.340516
NCU04817	gene8440	0.341226
NCU09862	gene8942	0.342584
NCU05985	gene8981	0.343169
NCU01479	gene7690	0.343363
NCU08410	gene3445	0.343553
NCU08552	gene4811	0.343973
NCU04336	gene5895	0.344317
NCU01413	gene7531	0.344586
NCU01965	gene467	0.344723
NCU08861	gene6524	0.345617
NCU00962	gene1593	0.34656
NCU06111	gene9754	0.347119
NCU01744	gene3103	0.34756
NCU06353	gene5607	0.347569
NCU09540	gene7671	0.347588
NCU01069	gene7181	0.348083
NCU01993	gene438	0.349482
NCU12151	gene9247	0.349701
NCU06428	gene3857	0.349749
NCU06248	gene4024	0.3498
NCU01296	gene7410	0.351251
NCU04412	gene5812	0.351262
NCU00211	gene4277	0.351376
NCU10101	gene6395	0.351492
NCU02619	gene773	0.351541
NCU05623	gene8534	0.351691
NCU02269	gene10063	0.352145
NCU08195	gene4710	0.352282
NCU00487	gene4559	0.352584
NCU04155	gene7810	0.352862
NCU07659	gene5024	0.353487
NCU00204	gene4269	0.35415
NCU02771	gene2365	0.354546
NCU07497	gene109	0.354604
NCU01809	gene3034	0.354774
NCU05392	gene2821	0.354908
NCU06461	gene3889	0.355069
NCU05227	gene6416	0.355454
NCU05890	gene10385	0.356514
NCU04142	gene7796	0.356655
NCU08138	gene10168	0.356894
NCU09352	gene3501	0.357384
NCU01511	gene3284	0.357787
NCU08988	gene4589	0.357938
NCU00294	gene4368	0.357982
NCU09647	gene4917	0.358185
NCU03365	gene2736	0.358356
NCU05552	gene8615	0.358923
NCU01725	gene3115	0.359325
NCU02157	gene260	0.359734
NCU01784	gene3068	0.36038
NCU00792	gene1781	0.360774
NCU03343	gene2759	0.361065
NCU05582	gene8582	0.361737
NCU03352	gene2750	0.361943
NCU05304	gene6338	0.3623
NCU03425	gene2672	0.362898
NCU08794	gene4848	0.363896
NCU04921	gene5109	0.364847
NCU10185	gene6679	0.365122
NCU08816	gene6281	0.365338
NCU02334	gene9988	0.365996
NCU00106	gene4166	0.366324
NCU00114	gene4175	0.367278
NCU07807	gene1099	0.367509
NCU00629	gene1945	0.367615
NCU07509	gene95	0.368352
NCU00372	gene4447	0.368408
NCU02705	gene861	0.368411
NCU01271	gene7383	0.368437
NCU09802	gene967	0.368498
NCU01689	gene3135	0.36902
NCU04022	gene8866	0.369237
NCU00952	gene1603	0.369611
NCU09320	gene1006	0.370552
NCU03926	gene8773	0.370735
NCU07533	gene4678	0.371242
NCU03735	gene7006	0.371324
NCU11261	gene7019	0.371762
NCU07058	gene8285	0.372287
NCU02336	gene9986	0.372432
NCU01570	gene3226	0.372464
NCU03150	gene1117	0.372827
NCU08290	gene5535	0.372847
NCU06320	gene5642	0.373371
NCU02994	gene2146	0.373533
NCU03771	gene7042	0.373927
NCU08329	gene5498	0.374478
NCU07826	gene3759	0.375226
NCU09089	gene207	0.376036
NCU06371	gene5589	0.377647
NCU05281	gene6361	0.377724
NCU07506	gene99	0.377865
NCU01329	gene7446	0.378188
NCU01302	gene7417	0.378411
NCU01568	gene3228	0.378506
NCU00971	gene1582	0.379496
NCU06606	gene5355	0.380033
NCU01650	gene3165	0.381557
NCU03986	gene8830	0.382141
NCU07731	gene5414	0.382483
NCU03080	gene1046	0.383182
NCU03853	gene8708	0.383202
NCU12100	gene8655	0.38385
NCU05421	gene2840	0.383998
NCU04825	gene8449	0.384075
NCU00644	gene1931	0.384367
NCU00405	gene4481	0.385255
NCU02474	gene617	0.385621
NCU08807	gene6295	0.386443
NCU07409	gene1470	0.387374
NCU02566	gene719	0.387722
NCU00202	gene1943	0.387753
NCU05551	gene8616	0.388268
NCU01412	gene7530	0.389609
NCU09930	gene6311	0.389633
NCU08994	gene4597	0.38975
NCU01800	gene3043	0.389991
NCU09858	gene8057	0.390045
NCU01897	gene539	0.390135
NCU08048	gene5979	0.390518
NCU05522	gene8648	0.391693
NCU08893	gene6683	0.39174
NCU03960	gene8800	0.392288
NCU11220	gene9218	0.392328
NCU03146	gene1113	0.392619
NCU01983	gene448	0.392678
NCU10062	gene8039	0.393115
NCU03004	gene2138	0.393351
NCU00310	gene4385	0.393372
NCU12097	gene8586	0.394039
NCU09129	gene1326	0.394141
NCU09794	gene8492	0.394489
NCU06471	gene3898	0.394652
NCU06010	gene8954	0.395255
NCU05250	gene6393	0.395809
NCU05561	gene8605	0.39593
NCU02147	gene272	0.39639
NCU01816	gene3027	0.396539
NCU01680	gene3140	0.397258
NCU05226	gene6417	0.397441
NCU04177	gene7832	0.398568
NCU06340	gene5622	0.398771
NCU01260	gene7373	0.398917
NCU04503	gene5704	0.399368
NCU02977	gene2159	0.399585
NCU01102	gene7216	0.399673
NCU01379	gene7496	0.400558
NCU06047	gene9824	0.401195
NCU05752	gene10232	0.40132
NCU04050	gene8894	0.401745
NCU07846	gene3778	0.402204
NCU08728	gene3409	0.402544
NCU08990	gene4591	0.402589
NCU09935	gene6308	0.403431
NCU01894	gene542	0.404151
NCU05293	gene6349	0.404551
NCU06187	gene3960	0.405001
NCU03500	gene2595	0.405624
NCU07814	gene6542	0.405653
NCU08904	gene6667	0.405703
NCU01428	gene7745	0.405898
NCU00634	gene1940	0.407726
NCU04196	gene7850	0.408051
NCU01317	gene7433	0.410596
NCU06214	gene3989	0.41065
NCU00303	gene4378	0.410745
NCU03559	gene2537	0.412566
NCU05849	gene10342	0.413074
NCU03738	gene7009	0.413134
NCU05025	gene9220	0.413148
NCU04644	gene6773	0.413524
NCU01082	gene7194	0.413611
NCU01444	gene7726	0.414014
NCU00967	gene1586	0.414063
NCU04243	gene7893	0.41461
NCU01404	gene7522	0.415297
NCU01552	gene3242	0.416019
NCU00824	gene1745	0.416374
NCU08743	gene3426	0.41699
NCU09816	gene983	0.417861
NCU12125	gene8972	0.42059
NCU05515	gene8657	0.421034
NCU03781	gene7051	0.421364
NCU01422	gene7542	0.421473
NCU07551	gene4656	0.421625
NCU01506	gene3287	0.421824
NCU02271	gene10061	0.421927
NCU04277	gene7922	0.422249
NCU02106	gene314	0.42297
NCU01669	gene3148	0.423358
NCU10483	gene2674	0.4246
NCU08500	gene3337	0.42465
NCU01452	gene7718	0.42542
NCU00706	gene1872	0.4256
NCU08620	gene2445	0.426104
NCU07550	gene4657	0.426269
NCU09841	gene8041	0.427229
NCU01121	gene7234	0.427248
NCU03897	gene8751	0.428333
NCU02172	gene245	0.428748
NCU03703	gene6978	0.42877
NCU06596	gene5346	0.428948
NCU06743	gene2985	0.429202
NCU08882	gene6500	0.430152
NCU07386	gene1492	0.430488
NCU07182	gene8145	0.430514
NCU02250	gene10082	0.430576
NCU02967	gene2168	0.430828
NCU06721	gene7641	0.430854
NCU06395	gene5567	0.431321
NCU00136	gene4202	0.431516
NCU04020	gene8864	0.43172
NCU08693	gene5983	0.431938
NCU04331	gene6210	0.433067
NCU03488	gene2609	0.433863
NCU02475	gene618	0.434026
NCU01351	gene7469	0.434724
NCU09789	gene8485	0.434827
NCU00092	gene4152	0.434829
NCU08352	gene1387	0.435017
NCU09303	gene9263	0.435134
NCU00977	gene1575	0.435148
NCU07014	gene3763	0.43538
NCU08627	gene2453	0.435428
NCU08667	gene6014	0.435516
NCU09602	gene2503	0.435567
NCU08296	gene5529	0.436041
NCU04799	gene8420	0.436075
NCU09456	gene9334	0.436259
NCU04945	gene5137	0.436336
NCU06308	gene5654	0.436454
NCU09475	gene3553	0.436767
NCU05542	gene8626	0.436853
NCU08225	gene4734	0.437817
NCU11012	gene4094	0.43943
NCU02707	gene863	0.4412
NCU03197	gene1168	0.441326
NCU08767	gene4882	0.442429
NCU08502	gene3335	0.443025
NCU01811	gene3032	0.443383
NCU04569	gene6861	0.44339
NCU05526	gene8644	0.443593
NCU02612	gene766	0.443815
NCU09091	gene209	0.444244
NCU09911	gene11	0.445046
NCU09476	gene3554	0.445167
NCU02954	gene2182	0.445188
NCU08963	gene8026	0.445751
NCU04571	gene6859	0.446292
NCU02720	gene874	0.446422
NCU07656	gene5021	0.446477
NCU04768	gene8387	0.447367
NCU02096	gene327	0.448168
NCU03840	gene7109	0.448492
NCU07914	gene5230	0.449086
NCU10003	gene3664	0.449743
NCU04483	gene5731	0.450228
NCU01780	gene3072	0.451247
NCU00258	gene4562	0.451399
NCU00520	gene2061	0.451513
NCU04620	gene6801	0.451823
NCU01272	gene7384	0.452274
NCU02549	gene700	0.452604
NCU07922	gene5222	0.453293
NCU09124	gene1320	0.453367
NCU00475	gene4549	0.453934
NCU06554	gene5302	0.454426
NCU09708	gene9632	0.455481
NCU07608	gene4971	0.455942
NCU01776	gene3076	0.456141
NCU00232	gene4301	0.456499
NCU07541	gene4666	0.459133
NCU08718	gene3399	0.460508
NCU09693	gene6703	0.460672
NCU06235	gene4012	0.46155
NCU02639	gene794	0.46173
NCU05776	gene10263	0.462265
NCU01185	gene7295	0.462644
NCU09422	gene9563	0.462648
NCU04779	gene8400	0.462727
NCU10351	gene2407	0.464658
NCU03565	gene2531	0.464812
NCU04225	gene7875	0.465889
NCU03363	gene2739	0.466669
NCU03229	gene1202	0.466717
NCU01966	gene466	0.467355
NCU05836	gene10328	0.46792
NCU00413	gene4490	0.469466
NCU02509	gene654	0.469751
NCU00088	gene4148	0.470457
NCU00110	gene4170	0.470499
NCU03806	gene7076	0.470567
NCU03038	gene2102	0.473295
NCU04518	gene5688	0.473493
NCU00893	gene1667	0.473626
NCU05789	gene10276	0.475194
NCU05287	gene6355	0.475275
NCU01949	gene484	0.475478
NCU03282	gene1251	0.47568
NCU05579	gene8585	0.476479
NCU04553	gene9655	0.476772
NCU00655	gene1920	0.477473
NCU07585	gene4941	0.478092
[truncated: 626 more rows]

## Sheet: LightInduced
Table 3: Accession Numbers for genes used in Light Induced figures
NCU Accession	Gene ID	Entropy Value
NCU06306	gene840	0.105253
NCU00667	gene1908	0.130758
NCU00273	gene4345	0.14101
NCU08840	gene6255	0.146674
NCU07430	gene175	0.150984
NCU07654	gene5019	0.156688
NCU07246	gene8080	0.158357
NCU08003	gene5929	0.162624
NCU04463	gene5758	0.164763
NCU08869	gene6516	0.167193
NCU07688	gene5458	0.168778
NCU03606	gene6895	0.173833
NCU06578	gene5328	0.181715
NCU05313	gene6330	0.185712
NCU06370	gene5590	0.186585
NCU04646	gene6771	0.190924
NCU02636	gene790	0.191781
NCU03555	gene2541	0.194126
NCU08135	gene10165	0.195411
NCU08298	gene5527	0.196578
NCU00406	gene4482	0.200051
NCU04534	gene9674	0.20083
NCU08468	gene3362	0.20311
NCU11300	gene9858	0.205162
NCU02790	gene2344	0.205679
NCU02385	gene9931	0.206715
NCU04548	gene9660	0.211179
NCU05936	gene9040	0.216825
NCU02282	gene10049	0.217427
NCU06751	gene2976	0.219433
NCU03112	gene1081	0.21962
NCU07262	gene6133	0.221855
NCU07380	gene1499	0.223189
NCU06342	gene5619	0.223945
NCU01922	gene511	0.22606
NCU06338	gene5624	0.226063
NCU01188	gene7298	0.228105
NCU07728	gene5416	0.229814
NCU07658	gene5023	0.232109
NCU03908	gene8760	0.23235
NCU00712	gene1866	0.233428
NCU05803	gene10292	0.236044
NCU04327	gene7974	0.237349
NCU03814	gene7083	0.241094
NCU06054	gene9817	0.241319
NCU02762	gene918	0.241907
NCU08661	gene6020	0.24414
NCU05238	gene6405	0.246844
NCU00193	gene4257	0.247946
NCU01240	gene7352	0.249359
NCU04609	gene6814	0.252196
NCU02466	gene610	0.253743
NCU07870	gene3805	0.258781
NCU00276	gene4348	0.260339
NCU04826	gene8450	0.264025
NCU06020	gene9852	0.264438
NCU01997	gene433	0.268145
NCU09894	gene959	0.269077
NCU08931	gene7992	0.269956
NCU05680	gene3693	0.274328
NCU08551	gene4812	0.285299
NCU02265	gene10066	0.285892
NCU01810	gene3033	0.288431
NCU08873	gene6512	0.28929
NCU05706	gene3717	0.298418
NCU01485	gene3307	0.300374
NCU02651	gene804	0.302
NCU04238	gene7889	0.303132
NCU01824	gene3017	0.303719
NCU07528	gene4683	0.307852
NCU10053	gene9544	0.308474
NCU01154	gene7261	0.311688
NCU01245	gene7357	0.316444
NCU02898	gene2241	0.322117
NCU07422	gene1457	0.322233
NCU02395	gene9921	0.323142
NCU04041	gene8884	0.327659
NCU09206	gene1425	0.328955
NCU07075	gene8263	0.329881
NCU10893	gene2408	0.331276
NCU08606	gene2431	0.332061
NCU06095	gene9768	0.333393
NCU00584	gene1990	0.337322
NCU02771	gene2365	0.354546
NCU07495	gene111	0.354653
NCU11367	gene4688	0.364085
NCU08816	gene6281	0.365338
NCU03893	gene8748	0.365961
NCU00372	gene4447	0.368408
NCU09615	gene2491	0.370417
NCU09783	gene8477	0.374052
NCU03986	gene8830	0.382141
NCU00332	gene4407	0.387277
NCU00202	gene1943	0.387753
NCU07927	gene5217	0.389533
NCU09858	gene8057	0.390045
NCU05522	gene8648	0.391693
NCU06348	gene5612	0.392629
NCU06366	gene5595	0.395438
NCU01555	gene3239	0.395616
NCU06055	gene9816	0.396421
NCU00766	gene1808	0.396597
NCU04237	gene7888	0.396764
NCU06340	gene5622	0.398771
NCU00678	gene1897	0.401487
NCU07846	gene3778	0.402204
NCU01894	gene542	0.404151
NCU06187	gene3960	0.405001
NCU02356	gene9961	0.407563
NCU07837	gene3769	0.411179
NCU02801	gene2330	0.413441
NCU05291	gene6351	0.414265
NCU06417	gene3844	0.423252
NCU01124	gene7237	0.423393
NCU07915	gene5229	0.423504
NCU05525	gene8645	0.426276
NCU02397	gene9919	0.426314
NCU09841	gene8041	0.427229
NCU01121	gene7234	0.427248
NCU07386	gene1492	0.430488
NCU04246	gene7896	0.432928
NCU03488	gene2609	0.433863
NCU08352	gene1387	0.435017
NCU06308	gene5654	0.436454
NCU06231	gene4008	0.437497
NCU02099	gene324	0.439953
NCU09683	gene6716	0.454189
NCU07608	gene4971	0.455942
NCU07541	gene4666	0.459133
NCU09195	gene1413	0.460645
NCU05789	gene10276	0.475194
NCU05287	gene6355	0.475275
NCU07585	gene4941	0.478092
NCU09513	gene3590	0.480033
NCU09451	gene9329	0.486852
NCU05721	gene3732	0.486928
NCU04816	gene8439	0.487463
NCU02480	gene624	0.489472
NCU07459	gene146	0.490544
NCU07439	gene166	0.498215
NCU06780	gene2946	0.499019
NCU09526	gene3577	0.499092
NCU07871	gene3806	0.500615
NCU01083	gene7195	0.502555
NCU00457	gene4532	0.502632
NCU03963	gene8803	0.512535
NCU08726	gene3407	0.513289
NCU04334	gene5897	0.51551
NCU09595	gene2510	0.518667
NCU10038	gene6494	0.52423
NCU06090	gene9772	0.524682
NCU07395	gene1484	0.529557
NCU04273	gene7918	0.535097
NCU09674	gene6725	0.535748
NCU06783	gene2943	0.536001
NCU01127	gene7238	0.537069
NCU04698	gene8305	0.537221
NCU02494	gene639	0.537624
NCU02596	gene750	0.538608
NCU03768	gene7039	0.54087
NCU05683	gene3695	0.542238
NCU02209	gene10124	0.542927
NCU02690	gene846	0.543246
NCU04923	gene5112	0.544198
NCU03682	gene6959	0.551935
NCU07349	gene1530	0.552293
NCU04924	gene5113	0.555014
NCU00748	gene1827	0.555423
NCU08291	gene5534	0.555949
NCU04295	gene7942	0.556977
NCU03780	gene7050	0.558196
NCU00360	gene4434	0.55876
NCU01089	gene7203	0.562139
NCU11424	gene9260	0.563853
NCU02540	gene691	0.570114
NCU00069	gene4126	0.571443
NCU08923	gene7982	0.571683
NCU02236	gene10097	0.572255
NCU03560	gene2536	0.572842
NCU01181	gene7291	0.575862
NCU00999	gene7117	0.577769
NCU01080	gene7192	0.580716
NCU06460	gene3888	0.58219
NCU03748	gene7018	0.58369
NCU02765	gene2372	0.589213
NCU08120	gene91	0.589399
NCU09057	gene9389	0.590528
NCU08295	gene5530	0.59359
NCU00838	gene1731	0.594519
NCU02396	gene9920	0.59524
NCU08949	gene8010	0.595791
NCU02713	gene869	0.597876
NCU00236	gene4306	0.59859
NCU08167	gene10199	0.599798
NCU00301	gene4375	0.603293
NCU05832	gene10324	0.605062
NCU09676	gene6724	0.605205
NCU06265	gene4043	0.605212
NCU09821	gene988	0.605793
NCU05881	gene10374	0.605907
NCU07802	gene6556	0.605932
NCU09504	gene3601	0.606303
NCU05594	gene8566	0.607538
NCU03205	gene1175	0.609214
NCU04256	gene7903	0.611989
NCU08409	gene3443	0.613896
NCU05387	gene2816	0.622803
NCU02477	gene620	0.625433
NCU00281	gene4353	0.628538
NCU00586	gene1988	0.629127
NCU06785	gene2941	0.631232
NCU05301	gene6341	0.632304
NCU03967	gene8808	0.633085
NCU02002	gene428	0.639774
NCU06125	gene9737	0.645325
NCU08595	gene2418	0.645583
NCU00397	gene4474	0.64562
NCU03107	gene1076	0.648445
NCU02629	gene783	0.650022
NCU04439	gene5782	0.652195
NCU03018	gene2124	0.653127
NCU07041	gene6238	0.65663
NCU01612	gene3195	0.660265
NCU07962	gene5179	0.663761
NCU04415	gene5809	0.667362
NCU05132	gene9102	0.67285
NCU05619	gene8540	0.674212
NCU06409	gene3832	0.677838
NCU08976	gene4577	0.681563
NCU04908	gene5095	0.682545
NCU06890	gene9431	0.682736
NCU04605	gene6819	0.684569
NCU06977	gene6171	0.687187
NCU03380	gene2721	0.688392
NCU01697	gene3131	0.689307
NCU05770	gene10255	0.693427
NCU02528	gene677	0.694907
NCU07307	gene6088	0.699049
NCU05395	gene2825	0.7003
NCU08287	gene5538	0.702779
NCU08850	gene6537	0.704948
NCU09403	gene9585	0.706942
NCU02321	gene10006	0.709217
NCU06468	gene3895	0.710564
NCU04909	gene5097	0.711481
NCU07233	gene8094	0.714004
NCU04385	gene5842	0.715261
NCU02333	gene9989	0.7158
NCU05835	gene10327	0.717594
NCU03241	gene1214	0.718953
NCU07073	gene8265	0.7275
NCU07082	gene8256	0.727579
NCU01589	gene3211	0.730114
NCU01524	gene3270	0.736663
NCU06217	gene3992	0.737762
NCU11264	gene8724	0.738995
NCU03949	gene8792	0.740523
NCU07273	gene6122	0.741365
NCU00350	gene4423	0.741661
NCU04485	gene5729	0.745507
NCU02066	gene363	0.745655
NCU03702	gene6977	0.74655
NCU05828	gene10319	0.747188
NCU01510	gene3285	0.749479
NCU03076	gene1041	0.751272
NCU09832	gene6640	0.753047
NCU02322	gene10005	0.753093
NCU01195	gene7306	0.753692
NCU04910	gene5098	0.755314
NCU08695	gene5980	0.755983
NCU08791	gene4851	0.760653
NCU07540	gene4667	0.763429
NCU05826	gene10316	0.763909
NCU07308	gene6087	0.767658
NCU02511	gene656	0.778602
NCU04416	gene5808	0.781713
NCU10063	gene8040	0.781761
NCU06603	gene5352	0.782155
NCU02284	gene10047	0.783175
NCU03753	gene7024	0.784211
NCU04348	gene5883	0.785389
NCU09692	gene6704	0.788864
NCU09823	gene6628	0.790483
NCU07375	gene1503	0.792727
NCU02729	gene884	0.79324
NCU00244	gene4314	0.793541
NCU06420	gene3848	0.795024
NCU09505	gene3600	0.796835
NCU08951	gene8011	0.797763
NCU08824	gene6273	0.799172
NCU08057	gene25	0.801245
NCU05384	gene2813	0.801411
NCU08155	gene10187	0.801574
NCU04538	gene9671	0.801839
NCU06803	gene2927	0.807767
NCU01862	gene576	0.81055
NCU03051	gene2085	0.810733
NCU06327	gene5636	0.812353
NCU03669	gene6951	0.813022
NCU09437	gene9314	0.815571
NCU01638	gene3176	0.818021
NCU03808	gene7078	0.820284
NCU03273	gene1241	0.822805
NCU07670	gene5484	0.824276
NCU02533	gene682	0.825674
NCU02122	gene296	0.825742
NCU05089	gene9147	0.828603
NCU03396	gene2707	0.828798
NCU08616	gene2441	0.830712
NCU04466	gene5752	0.831427
NCU06043	gene9827	0.831833
NCU09380	gene926	0.837167
NCU05652	gene8501	0.838288
NCU08898	gene6677	0.841552
NCU07061	gene8282	0.845315
NCU07166	gene8165	0.846195
NCU07921	gene5223	0.847225
NCU10129	gene0	0.852918
NCU01064	gene7176	0.853961
NCU06506	gene3936	0.855456
NCU03430	gene2665	0.855753
NCU08549	gene4815	0.858366
NCU05490	gene8686	0.864161
NCU03321	gene1295	0.865623
NCU07070	gene8268	0.865879
NCU08421	gene3456	0.871657
NCU09349	gene3498	0.87339
NCU03641	gene6927	0.874234
NCU11201	gene512	0.874599
NCU02074	gene354	0.876608
NCU07661	gene5494	0.878831
NCU04639	gene6780	0.879203
NCU09488	gene3566	0.885039
NCU05148	gene9088	0.886803
NCU04635	gene6784	0.88717
NCU11405	gene3598	0.888816
NCU05289	gene6353	0.893345
NCU08968	gene8032	0.896511
NCU09659	gene4931	0.898632
NCU01233	gene7347	0.899646
NCU01059	gene7169	0.913092
NCU02546	gene697	0.915908
NCU09713	gene9627	0.91633
NCU08626	gene2452	0.920936
NCU07806	gene6551	0.922181
NCU01675	gene3143	0.923233
NCU09830	gene6636	0.925574
NCU09421	gene9564	0.925896
NCU11175	gene4304	0.926551
NCU05142	gene9093	0.926699
NCU00336	gene4411	0.929578
NCU07267	gene6128	0.931437
NCU05005	gene9242	0.931861
NCU11321	gene5272	0.936091
NCU09499	gene3605	0.937713
NCU07156	gene8176	0.938711
NCU01257	gene7369	0.943462
NCU04360	gene5868	0.944882
NCU00761	gene1813	0.945008
NCU00925	gene1635	0.949491
NCU01058	gene7168	0.964216
NCU04539	gene9670	0.965307
NCU05830	gene10322	0.971939
NCU00868	gene1696	0.972458
NCU00337	gene4412	0.974352
NCU10852	gene1309	0.974641
NCU11395	gene9383	0.976854
NCU06341	gene5620	0.994101
NCU00582	gene1992	0.99542
NCU09305	gene9261	0.995723
NCU01957	gene476	1.01672
NCU03506	gene2589	1.01898
NCU09235	gene2412	1.02098
NCU03066	gene1033	1.02943
NCU08518	gene3316	1.03165
NCU03561	gene2535	1.05317
NCU05143	gene9092	1.05721
NCU08425	gene3460	1.06458
NCU04452	gene5769	1.06946
NCU06272	gene4051	1.07483
NCU07074	gene8264	1.07575
NCU06549	gene5297	1.09295
NCU09116	gene1311	1.09438
NCU01056	gene7166	1.09549
NCU11356	gene3708	1.09618
NCU09604	gene2500	1.09724
NCU01870	gene566	1.09913
NCU00985	gene1567	1.1075
NCU09041	gene9372	1.10795
NCU05524	gene8646	1.11274
NCU07696	gene5449	1.11327
NCU04720	gene8331	1.11576
NCU05650	gene8504	1.11778
NCU05341	gene2781	1.11937
NCU08535	gene4829	1.12375
NCU03608	gene6897	1.12896
NCU07325	gene6064	1.13233
NCU00821	gene1748	1.13399
NCU04016	gene8859	1.13622
NCU08487	gene3348	1.13877
NCU07434	gene171	1.14238
NCU07345	gene1533	1.14328
NCU06912	gene9455	1.15311
NCU07736	gene6627	1.15563
NCU09714	gene9625	1.16324
NCU04823	gene8447	1.16429
NCU01861	gene577	1.17162
NCU06558	gene5306	1.17334
NCU07337	gene6048	1.17556
NCU04430	gene5792	1.17974
NCU05819	gene10307	1.18012
NCU10055	gene9610	1.19929
NCU05069	gene9167	1.2016
NCU00175	gene4239	1.20306
NCU00247	gene4317	1.20613
NCU00322	gene4398	1.21491
NCU01088	gene7201	1.22058
NCU05165	gene6483	1.24303
NCU01070	gene7182	1.25257
NCU08413	gene3448	1.25826
NCU01107	gene7222	1.2598
NCU10021	gene9607	1.26462
NCU04914	gene5102	1.26731
NCU07149	gene8184	1.27148
NCU09497	gene3608	1.28197
NCU05534	gene8636	1.29206
NCU08727	gene3408	1.29416
NCU05964	gene9008	1.29764
NCU07067	gene8271	1.3193
NCU07474	gene133	1.31991
NCU01065	gene7177	1.32104
NCU00790	gene1782	1.32665
NCU00585	gene1989	1.34832
NCU08747	gene3430	1.34963
NCU05154	gene9080	1.35552
NCU09506	gene3599	1.36927
NCU10687	gene275	1.37321
NCU12022	gene9682	1.3769
NCU00755	gene1819	1.37853
NCU07974	gene5898	1.41742
NCU04805	gene8426	1.42324
NCU05712	gene3724	1.42764
NCU06597	gene5347	1.44866
NCU09559	gene9543	1.44957
NCU07923	gene5221	1.4601
NCU01060	gene7170	1.47729
NCU08557	gene4806	1.49076
NCU09040	gene9371	1.49707
NCU06607	gene5356	1.50598
NCU00701	gene1875	1.50767
NCU03092	gene1061	1.53788
NCU08390	gene1343	1.53869
NCU09873	gene8694	1.54971
NCU08402	gene3434	1.55144
NCU06616	gene5366	1.5594
NCU03813	gene7082	1.56991
NCU04963	gene5154	1.59803
NCU05844	gene10338	1.60131
NCU08769	gene4880	1.60549
NCU04667	gene6749	1.61319
NCU04267	gene7912	1.61994
NCU10895	gene1783	1.62974
NCU02190	gene10150	1.63422
NCU11050	gene5877	1.63862
NCU08325	gene5502	1.64762
NCU02482	gene626	1.65573
NCU04950	gene5144	1.6562
NCU05822	gene10310	1.70658
NCU09909	gene9	1.70673
NCU05627	gene8529	1.71963
NCU11365	gene4955	1.72393
NCU02344	gene9976	1.74212
NCU00552	gene2028	1.76292
NCU01735	gene3110	1.78311
NCU07441	gene164	1.80265
NCU04583	gene6846	1.80817
NCU05202	gene6444	1.8207
NCU08457	gene3366	1.82352
NCU10040	gene6492	1.8273
NCU12021	gene9683	1.83316
NCU01063	gene7175	1.83368
NCU07569	gene4634	1.86161
NCU00250	gene4320	1.86244
NCU08699	gene3379	1.87975
NCU04433	gene5788	1.90398
NCU09049	gene9380	1.94039
NCU02798	gene2333	1.97506
NCU00451	gene4527	2.00383
NCU08770	gene4879	2.04896
NCU09508	gene3595	2.10155
NCU09141	gene1338	2.10225
NCU00203	gene4268	2.12078
NCU09764	gene3525	2.1342
NCU07787	gene6569	2.14389
NCU09075	gene193	2.1573
NCU09775	gene3514	2.18563
NCU07143	gene8191	2.22042
NCU05568	gene8597	2.22546
NCU08907	gene6663	2.22567
NCU05788	gene10275	2.23146
NCU11309	gene6748	2.25591
NCU01108	gene7223	2.27856
NCU00716	gene1861	2.3254
NCU04528	gene9681	2.34294
NCU05126	gene9109	2.37934
NCU10641	gene4884	2.41084
NCU02916	gene2222	2.52361
NCU02369	gene9948	2.6667
NCU09914	gene14	2.83226
NCU10470	gene1111	3.00563
NCU05768	gene10253	3.11588
NCU07232	gene8095	3.35545
NCU01011	gene7129	4.28069

## Sheet: Development
Table 3: Accession Numbers for genes used in Development figures
NCU Accession	Gene ID	Entropy Value
NCU04794	gene8415	0.050664
NCU02717	gene871	0.0566151
NCU03957	gene8799	0.0570696
NCU03479	gene2618	0.0582233
NCU06059	gene9812	0.0603514
NCU02289	gene10041	0.0604739
NCU00571	gene2006	0.0614796
NCU00325	gene4400	0.0626819
NCU09269	gene2375	0.0638155
NCU01234	gene7348	0.0639146
NCU00216	gene4283	0.0652381
NCU11372	gene5481	0.0653098
NCU08578	gene955	0.0657064
NCU07280	gene6116	0.0657065
NCU06740	gene2988	0.0658554
NCU03311	gene1285	0.0680394
NCU09696	gene6698	0.0687425
NCU06355	gene5605	0.0692544
NCU03526	gene2571	0.07003
NCU02025	gene405	0.0702276
NCU00210	gene4276	0.0722917
NCU05452	gene2853	0.0728041
NCU04337	gene5894	0.0729273
NCU01310	gene7425	0.0739846
NCU03345	gene2757	0.0740468
NCU07577	gene4626	0.0753149
NCU08991	gene4592	0.0767768
NCU00212	gene4279	0.0769766
NCU06091	gene9771	0.0776404
NCU06994	gene6190	0.0778064
NCU09900	gene965	0.0779145
NCU09547	gene7679	0.080566
NCU06498	gene3930	0.0824089
NCU03055	gene1021	0.0829607
NCU00566	gene2012	0.0829907
NCU03971	gene8813	0.0830233
NCU00181	gene4246	0.0834335
NCU02371	gene9945	0.083531
NCU00617	gene1960	0.0840968
NCU03670	gene6952	0.0843736
NCU07665	gene5489	0.084457
NCU01332	gene7449	0.0844817
NCU06030	gene9841	0.085509
NCU02001	gene429	0.0857427
NCU06622	gene5372	0.0867851
NCU02432	gene9881	0.0880943
NCU03264	gene1233	0.0881517
NCU06630	gene5380	0.0893897
NCU02754	gene911	0.0894105
NCU01388	gene7504	0.0894133
NCU04244	gene7894	0.089472
NCU09249	gene2395	0.0895505
NCU01913	gene522	0.0897652
NCU05240	gene6403	0.0898498
NCU08093	gene63	0.0899148
NCU05543	gene8623	0.0902166
NCU04426	gene5796	0.0905499
NCU02635	gene789	0.0906292
NCU01336	gene7453	0.090685
NCU09879	gene1547	0.0908704
NCU06674	gene7589	0.0914164
NCU09202	gene1421	0.0915027
NCU01016	gene7134	0.092347
NCU00488	gene4560	0.0924437
NCU03436	gene2662	0.0924585
NCU01235	gene7349	0.092916
NCU03774	gene7044	0.0929447
NCU07893	gene5253	0.0930518
NCU06877	gene9417	0.0931482
NCU01341	gene7458	0.0931942
NCU11251	gene1167	0.0934834
NCU01523	gene3271	0.0941827
NCU09779	gene8472	0.0944037
NCU02803	gene2328	0.0946038
NCU02615	gene769	0.0951454
NCU11259	gene6955	0.0955987
NCU03300	gene1273	0.0956213
NCU03261	gene1231	0.0957933
NCU01184	gene7294	0.0959285
NCU03039	gene2101	0.0959671
NCU01255	gene7366	0.0960905
NCU02572	gene726	0.096188
NCU04082	gene8927	0.0964142
NCU02113	gene307	0.0965274
NCU07290	gene6106	0.0965744
NCU09537	gene7668	0.0966484
NCU05797	gene10285	0.0972148
NCU04759	gene8376	0.0972311
NCU06693	gene7608	0.0982891
NCU03138	gene1106	0.0983412
NCU01767	gene3082	0.0983716
NCU01410	gene7527	0.098611
NCU04507	gene5700	0.0995016
NCU03435	gene2663	0.0995388
NCU09386	gene921	0.0997175
NCU03124	gene1092	0.0997923
NCU04651	gene6766	0.0998975
NCU09014	gene4619	0.0999774
NCU11174	gene4278	0.10017
NCU08505	gene3332	0.100691
NCU07683	gene5466	0.10125
NCU04114	gene7766	0.101413
NCU09319	gene1007	0.101418
NCU03193	gene1163	0.101968
NCU03627	gene6913	0.102362
NCU03438	gene2659	0.10263
NCU00209	gene4275	0.102656
NCU09813	gene978	0.102837
NCU00914	gene1649	0.10306
NCU07399	gene1481	0.103083
NCU09221	gene1443	0.103854
NCU02812	gene2319	0.10411
NCU08989	gene4590	0.104171
NCU01918	gene518	0.104469
NCU06463	gene3891	0.104969
NCU00649	gene1926	0.105099
NCU09609	gene2496	0.105115
NCU09871	gene8697	0.106094
NCU06706	gene7624	0.106775
NCU01601	gene3202	0.1068
NCU04121	gene7773	0.106834
NCU01614	gene3193	0.106938
NCU00091	gene4151	0.107643
NCU08348	gene1391	0.107804
NCU01183	gene7293	0.108103
NCU02806	gene2325	0.108218
NCU01202	gene7314	0.108425
NCU02961	gene2174	0.108451
NCU07558	gene4647	0.108674
NCU01164	gene7272	0.10885
NCU03800	gene7070	0.109019
NCU00569	gene2008	0.109536
NCU00664	gene1911	0.109616
NCU04120	gene7772	0.109644
NCU03625	gene6911	0.109695
NCU09721	gene9617	0.109932
NCU06855	gene2881	0.110214
NCU07681	gene5472	0.110669
NCU00636	gene1937	0.111256
NCU01644	gene3171	0.111285
NCU08024	gene5953	0.111365
NCU09107	gene1301	0.111894
NCU09065	gene183	0.112466
NCU03858	gene8713	0.112705
NCU04428	gene5794	0.113234
NCU04173	gene7828	0.113361
NCU07535	gene4674	0.113856
NCU08340	gene1399	0.114179
NCU02555	gene707	0.114206
NCU04742	gene8357	0.114253
NCU08218	gene4727	0.114459
NCU08034	gene5963	0.114489
NCU01930	gene503	0.115287
NCU06929	gene9476	0.115302
NCU03837	gene7106	0.115589
NCU07998	gene5924	0.115726
NCU01756	gene3093	0.11584
NCU03440	gene2657	0.115876
NCU04017	gene8861	0.115896
NCU02563	gene716	0.115958
NCU01771	gene3079	0.116241
NCU04811	gene8433	0.116358
NCU09688	gene6709	0.116445
NCU05587	gene8574	0.116483
NCU06314	gene5648	0.116527
NCU00443	gene4518	0.116894
NCU10073	gene966	0.117244
NCU02728	gene883	0.117251
NCU08312	gene5515	0.117353
NCU02219	gene10114	0.117527
NCU09757	gene3534	0.11756
NCU03839	gene7108	0.117928
NCU03050	gene2086	0.117981
NCU09727	gene5409	0.118103
NCU04242	gene7892	0.118109
NCU05433	gene2848	0.118153
NCU00334	gene4409	0.118157
NCU01249	gene7361	0.118218
NCU00043	gene4099	0.11855
NCU09483	gene3561	0.118811
NCU02634	gene788	0.119387
NCU11228	gene910	0.119463
NCU01724	gene3116	0.119465
NCU03850	gene8705	0.119647
NCU04600	gene6825	0.119675
NCU09377	gene929	0.120011
NCU04136	gene7791	0.120459
NCU01615	gene3192	0.120519
NCU07727	gene5417	0.120652
NCU04320	gene7967	0.120744
NCU08706	gene3387	0.120842
NCU03238	gene1210	0.120977
NCU04581	gene6847	0.121025
NCU00772	gene1801	0.12118
NCU05220	gene6425	0.121581
NCU02631	gene785	0.121724
NCU03588	gene6878	0.121754
NCU09381	gene925	0.121909
NCU03460	gene2643	0.122158
NCU03726	gene6999	0.122402
NCU01762	gene3087	0.12266
NCU01795	gene3049	0.122671
NCU01929	gene504	0.122934
NCU01484	gene3308	0.123166
NCU04335	gene5896	0.123281
NCU03458	gene2645	0.123402
NCU01954	gene480	0.123555
NCU03901	gene8754	0.123655
NCU00333	gene4408	0.123754
NCU00517	gene2064	0.124009
NCU11427	gene2995	0.12406
NCU04317	gene7963	0.124305
NCU07330	gene6057	0.124344
NCU06777	gene2949	0.124402
NCU00920	gene1643	0.126379
NCU02000	gene430	0.126475
NCU02177	gene235	0.12649
NCU00725	gene1849	0.126603
NCU05959	gene9013	0.126915
NCU02387	gene9929	0.126919
NCU09481	gene3559	0.127051
NCU06617	gene5367	0.127059
NCU03892	gene8746	0.12779
NCU00470	gene4544	0.127804
NCU07699	gene5446	0.12797
NCU09360	gene946	0.128903
NCU03932	gene8777	0.128922
NCU01828	gene3013	0.129122
NCU05714	gene3726	0.129143
NCU05145	gene9091	0.129578
NCU00528	gene2052	0.12959
NCU03915	gene8766	0.129652
NCU02388	gene9928	0.129665
NCU01792	gene3054	0.129816
NCU08514	gene3320	0.129845
NCU03212	gene1182	0.130058
NCU06941	gene9490	0.130128
NCU02696	gene852	0.130324
NCU01990	gene441	0.130348
NCU00667	gene1908	0.130758
NCU05991	gene8975	0.130758
NCU06767	gene2960	0.130898
NCU03169	gene1137	0.13096
NCU03662	gene6947	0.13099
NCU02012	gene418	0.131097
NCU08157	gene10189	0.131285
NCU11410	gene9269	0.131432
NCU10715	gene9770	0.131505
NCU03483	gene2613	0.131584
NCU06552	gene5300	0.131672
NCU02578	gene732	0.131966
NCU06049	gene9822	0.131994
NCU06397	gene5565	0.132001
NCU00690	gene1887	0.132513
NCU03833	gene7102	0.132561
NCU05274	gene6369	0.132571
NCU05342	gene2782	0.132574
NCU02223	gene10110	0.132644
NCU04152	gene7807	0.13298
NCU02970	gene2165	0.133114
NCU03461	gene2642	0.133225
NCU11258	gene9874	0.133536
NCU09880	gene1545	0.133585
NCU00453	gene4528	0.133667
NCU03200	gene1171	0.133894
NCU08301	gene5524	0.134105
NCU06859	gene9397	0.134226
NCU01362	gene7479	0.134231
NCU00396	gene4472	0.134602
NCU02706	gene862	0.134623
NCU07952	gene5188	0.134726
NCU04636	gene6783	0.134734
NCU09982	gene606	0.134839
NCU07943	gene5196	0.134982
NCU00218	gene4286	0.135187
NCU03135	gene1103	0.135266
NCU00592	gene1983	0.135755
NCU01216	gene7333	0.135805
NCU02498	gene643	0.136077
NCU02160	gene257	0.136292
NCU09814	gene980	0.1364
NCU08959	gene8020	0.136442
NCU01166	gene7274	0.136844
NCU02048	gene382	0.13686
NCU05588	gene8573	0.137465
NCU02839	gene2302	0.137504
NCU03147	gene1114	0.137533
NCU09808	gene973	0.137641
NCU01587	gene3212	0.137818
NCU05279	gene6363	0.13789
NCU09299	gene9267	0.137991
NCU05295	gene6347	0.138457
NCU05041	gene9197	0.138458
NCU02984	gene2152	0.138527
NCU00593	gene1982	0.13864
NCU04405	gene5819	0.138826
NCU09119	gene1315	0.139083
NCU01799	gene3044	0.139196
NCU00969	gene1584	0.139208
NCU06238	gene4015	0.139263
NCU07734	gene5411	0.139276
NCU03384	gene2717	0.139438
NCU03766	gene7037	0.139477
NCU00926	gene1634	0.13957
NCU09311	gene1015	0.139748
NCU02538	gene689	0.139791
NCU09315	gene1011	0.140002
NCU06742	gene2986	0.140357
NCU04423	gene5800	0.140654
NCU03226	gene1197	0.140886
NCU04570	gene6860	0.14099
NCU09709	gene9631	0.141025
NCU05302	gene6340	0.141055
NCU03482	gene2614	0.141372
NCU05642	gene8512	0.141381
NCU03115	gene1084	0.14142
NCU02372	gene9944	0.141683
NCU06285	gene5673	0.142164
NCU02403	gene9911	0.142234
NCU00738	gene1837	0.142627
NCU05772	gene10257	0.142844
NCU06958	gene6149	0.142854
NCU02743	gene898	0.142884
NCU06446	gene3874	0.142933
NCU01433	gene7740	0.14298
NCU09240	gene2405	0.142997
NCU06907	gene9451	0.143081
NCU07886	gene3821	0.14332
NCU01794	gene3050	0.143346
NCU03237	gene1209	0.143348
NCU06713	gene7632	0.143387
NCU09132	gene1329	0.143394
NCU03572	gene2524	0.1434
NCU04813	gene8436	0.143689
NCU03786	gene7056	0.143856
NCU03980	gene8824	0.143946
NCU02830	gene2307	0.144112
NCU06369	gene5592	0.14415
NCU00272	gene4344	0.144724
NCU01443	gene7727	0.144933
NCU04387	gene5840	0.145462
NCU02316	gene10012	0.145791
NCU09512	gene3591	0.146259
NCU02520	gene668	0.146316
NCU03232	gene1205	0.14654
NCU03816	gene7086	0.146606
NCU08840	gene6255	0.146674
NCU03564	gene2532	0.146836
NCU03278	gene1246	0.146846
NCU02828	gene2309	0.147261
NCU05204	gene6442	0.147419
NCU02176	gene236	0.147462
NCU06472	gene3899	0.147517
NCU07866	gene3800	0.147834
NCU05234	gene6409	0.14796
NCU00521	gene2060	0.148684
NCU07579	gene4624	0.148763
NCU11159	gene2974	0.148783
NCU07000	gene6197	0.148809
NCU04986	gene5163	0.148867
NCU09005	gene4608	0.14887
NCU01119	gene7232	0.149084
NCU02464	gene608	0.149214
NCU03822	gene7092	0.149214
NCU00416	gene4493	0.149319
NCU00587	gene1987	0.149352
NCU02218	gene10115	0.149824
NCU01527	gene3267	0.149872
NCU05222	gene6423	0.150088
NCU08427	gene3463	0.150163
NCU01994	gene437	0.150375
NCU11369	gene5469	0.150425
NCU08289	gene5536	0.150699
NCU00484	gene4556	0.150826
NCU10477	gene8520	0.150832
NCU04448	gene5774	0.150833
NCU01817	gene3026	0.150908
NCU07430	gene175	0.150984
NCU01920	gene516	0.151362
NCU00172	gene4236	0.151531
NCU01549	gene3245	0.151685
NCU06760	gene2967	0.151811
NCU01161	gene7269	0.151927
NCU04104	gene7756	0.152028
NCU02776	gene2359	0.152064
NCU05944	gene9031	0.152179
NCU02104	gene316	0.152232
NCU07567	gene4636	0.152253
NCU08300	gene5525	0.152333
NCU03911	gene8763	0.152373
NCU03882	gene8734	0.152373
NCU08309	gene5518	0.152428
NCU01177	gene7286	0.152723
NCU01962	gene470	0.153134
NCU01826	gene3016	0.153141
NCU08730	gene3411	0.153209
NCU03601	gene6890	0.153215
NCU09121	gene1317	0.153508
NCU02965	gene2170	0.153804
NCU03338	gene2764	0.15394
NCU03623	gene6909	0.154224
NCU00347	gene4420	0.15442
NCU01160	gene7268	0.154668
NCU09142	gene1339	0.154686
NCU06959	gene6150	0.155157
NCU02680	gene835	0.155318
NCU06488	gene6651	0.155559
NCU02602	gene756	0.155989
NCU03711	gene6987	0.156165
NCU02749	gene905	0.156388
NCU00536	gene2044	0.156413
NCU00171	gene4235	0.156492
NCU03602	gene6891	0.156623
NCU04944	gene5136	0.156703
NCU01859	gene579	0.156746
NCU03543	gene2554	0.156757
NCU06440	gene3869	0.15685
NCU01766	gene3083	0.156872
NCU03998	gene8844	0.1569
NCU03727	gene7000	0.157297
NCU01175	gene7284	0.157723
NCU02559	gene712	0.157725
NCU04149	gene7804	0.157828
NCU07483	gene124	0.15785
NCU09722	gene9616	0.157887
NCU07580	gene4623	0.158
NCU01843	gene3000	0.158091
NCU08026	gene5955	0.158189
NCU08993	gene4596	0.158373
NCU09748	gene5385	0.158574
NCU01761	gene3088	0.15858
NCU07911	gene5232	0.158912
NCU00418	gene4495	0.158952
NCU03770	gene7041	0.159069
NCU02268	gene10064	0.159082
NCU01702	gene3126	0.159189
NCU00422	gene4499	0.159199
NCU03810	gene7080	0.159406
NCU00823	gene1746	0.159498
NCU03906	gene8758	0.159583
NCU00614	gene1962	0.159645
NCU00930	gene1629	0.15973
NCU03752	gene7023	0.159772
NCU09290	gene9280	0.159958
NCU02263	gene10068	0.160017
NCU10905	gene8380	0.160533
NCU09388	gene919	0.160595
NCU04003	gene8847	0.160757
NCU07437	gene168	0.160858
NCU04724	gene8335	0.161017
NCU07296	gene6100	0.161025
NCU09076	gene194	0.161063
NCU08380	gene1352	0.161102
NCU07171	gene8159	0.161103
NCU09309	gene1017	0.161342
NCU03381	gene2720	0.161422
NCU01192	gene7303	0.161492
NCU00568	gene2009	0.161723
NCU04755	gene8372	0.161905
NCU08374	gene1360	0.161966
NCU00966	gene1589	0.16206
NCU01791	gene3055	0.162091
NCU09118	gene1314	0.162282
NCU00107	gene4167	0.162379
NCU06715	gene7634	0.162443
NCU03888	gene8741	0.162449
NCU08357	gene1381	0.162578
NCU06602	gene5351	0.162706
NCU00420	gene4497	0.162888
NCU02968	gene2167	0.162973
NCU08151	gene10183	0.163016
NCU10273	gene5993	0.163079
NCU09747	gene5386	0.163097
NCU09258	gene2386	0.163265
NCU04495	gene5713	0.163268
NCU02784	gene2350	0.163312
NCU01141	gene7247	0.163511
NCU06300	gene5662	0.16355
NCU07700	gene5445	0.163672
NCU06243	gene4019	0.163795
NCU00157	gene4220	0.163842
NCU05809	gene10297	0.163969
NCU01366	gene7483	0.163984
NCU02016	gene414	0.164035
NCU04737	gene8352	0.164094
NCU05750	gene10230	0.164369
NCU06445	gene3873	0.164807
NCU03527	gene2570	0.164847
NCU02599	gene753	0.164944
NCU08134	gene10164	0.16514
NCU01274	gene7386	0.165488
NCU00435	gene4510	0.165525
NCU06588	gene5338	0.165673
NCU02105	gene315	0.165939
NCU01992	gene439	0.166041
NCU04414	gene5810	0.166506
NCU03239	gene1211	0.166903
NCU06950	gene9501	0.166988
NCU02007	gene423	0.167807
NCU02840	gene2301	0.168104
NCU04617	gene6804	0.168212
NCU04202	gene7856	0.168242
NCU09700	gene9644	0.168544
NCU01174	gene7283	0.16855
NCU03616	gene6903	0.168613
NCU02561	gene714	0.168766
NCU07688	gene5458	0.168778
NCU07286	gene6110	0.168849
NCU06233	gene4010	0.16907
NCU08985	gene4586	0.169094
NCU10776	gene10043	0.169103
NCU02963	gene2172	0.169228
NCU03192	gene1162	0.16924
NCU05389	gene2818	0.169319
NCU00352	gene4425	0.169331
NCU09090	gene208	0.169378
NCU09897	gene962	0.169379
NCU02834	gene2305	0.169448
NCU09442	gene9320	0.169564
NCU07165	gene8166	0.169586
NCU09191	gene1409	0.169695
NCU06403	gene5559	0.17005
NCU09995	gene950	0.170064
NCU04032	gene8875	0.170203
NCU09123	gene1319	0.170226
NCU00434	gene4509	0.170248
NCU00345	gene4418	0.170424
NCU06561	gene5309	0.170585
NCU07682	gene5470	0.170724
NCU06696	gene7611	0.17076
NCU08566	gene4795	0.170779
NCU02018	gene412	0.170781
NCU06702	gene7618	0.170968
NCU01204	gene7316	0.17104
NCU03953	gene8795	0.171116
NCU07913	gene5231	0.17118
NCU02437	gene9875	0.171349
NCU03159	gene1127	0.171586
NCU01142	gene7248	0.171642
NCU06052	gene9819	0.171773
NCU03048	gene2088	0.171894
NCU01674	gene3144	0.171897
NCU06253	gene4030	0.17202
NCU01796	gene3048	0.172081
NCU01999	gene431	0.172185
NCU04100	gene7752	0.172427
NCU03028	gene2113	0.172509
NCU00440	gene4515	0.17262
NCU02149	gene269	0.172666
NCU06942	gene9491	0.173006
NCU04578	gene6851	0.173229
NCU00060	gene4118	0.173651
NCU00182	gene4247	0.173794
NCU03309	gene1283	0.174154
NCU04606	gene6818	0.174381
NCU08112	gene83	0.17474
NCU10036	gene3315	0.17474
NCU11348	gene8121	0.175
NCU01337	gene7454	0.17506
NCU04429	gene5793	0.175101
NCU01278	gene7391	0.175345
NCU07859	gene3792	0.175587
NCU03797	gene7067	0.175612
NCU06659	gene7573	0.175634
NCU01606	gene3200	0.175668
NCU03258	gene1228	0.175701
NCU11426	gene2996	0.175778
NCU04035	gene8878	0.175809
NCU06551	gene5299	0.175886
NCU01438	gene7734	0.176211
NCU03972	gene8814	0.176363
NCU08040	gene5971	0.1769
NCU06259	gene4037	0.177067
NCU04612	gene6811	0.177369
NCU00900	gene1660	0.177534
NCU09329	gene995	0.17755
NCU01907	gene527	0.177722
NCU04652	gene6765	0.178217
NCU03910	gene8762	0.178286
NCU08029	gene5958	0.178665
NCU02203	gene10131	0.178807
NCU04188	gene7841	0.179203
NCU04115	gene7767	0.179345
NCU05817	gene10305	0.179452
NCU02304	gene10025	0.179513
NCU04176	gene7831	0.179578
NCU07556	gene7523	0.180064
NCU05816	gene10303	0.180182
NCU09576	gene9525	0.18019
NCU02342	gene9978	0.18029
NCU01547	gene3247	0.180315
NCU09803	gene968	0.180367
NCU08894	gene6682	0.1806
NCU01467	gene7703	0.180774
NCU10044	gene1453	0.180822
NCU01499	gene3294	0.181025
NCU04558	gene9649	0.181082
NCU02510	gene655	0.181186
NCU11118	gene7620	0.181489
NCU06578	gene5328	0.181715
NCU10048	gene9000	0.18174
NCU02044	gene384	0.182062
NCU06410	gene3833	0.182332
NCU08046	gene5977	0.182383
NCU06344	gene5617	0.182399
NCU03223	gene1193	0.182674
NCU08511	gene3325	0.182742
NCU06500	gene3932	0.182766
NCU00527	gene2053	0.182878
NCU01047	gene7157	0.183317
NCU06870	gene9411	0.183525
NCU08111	gene82	0.18434
NCU03528	gene2569	0.184389
NCU08666	gene6015	0.184434
NCU02162	gene255	0.184438
NCU06722	gene7642	0.184475
NCU01939	gene493	0.184834
NCU05457	gene2856	0.184867
NCU04927	gene5117	0.185099
NCU03629	gene6915	0.185164
NCU06444	gene3872	0.185472
NCU00346	gene4419	0.185785
NCU05270	gene6373	0.185814
NCU07881	gene3816	0.186025
NCU09730	gene5406	0.186028
NCU00448	gene4524	0.186079
NCU07852	gene3785	0.18649
NCU02592	gene745	0.186549
NCU04370	gene5858	0.186596
NCU01984	gene447	0.186855
NCU10311	gene9648	0.187059
NCU06672	gene7586	0.187389
NCU01007	gene7125	0.187434
NCU09204	gene1423	0.187625
NCU09002	gene4605	0.187738
NCU02272	gene10060	0.187743
NCU06764	gene2963	0.187843
NCU03486	gene2610	0.187899
NCU05118	gene9119	0.188211
NCU05363	gene2796	0.188736
NCU04212	gene7864	0.18898
NCU06354	gene5606	0.189221
NCU01225	gene7342	0.189371
NCU09155	gene3619	0.189412
NCU00084	gene4144	0.189428
NCU05602	gene8557	0.189429
NCU00621	gene1956	0.189429
NCU02972	gene2164	0.189465
NCU00330	gene4405	0.189781
NCU00480	gene4553	0.189872
NCU03097	gene1066	0.190253
NCU00414	gene4491	0.19031
NCU09012	gene4617	0.190596
NCU10067	gene9968	0.190676
NCU03995	gene8841	0.190729
NCU08664	gene6016	0.190863
NCU08065	gene32	0.190884
NCU06628	gene5378	0.191413
NCU05664	gene3677	0.191503
NCU04166	gene7820	0.191541
NCU02472	gene615	0.19158
NCU02636	gene790	0.191781
NCU09861	gene8941	0.191819
NCU03765	gene7036	0.191851
NCU02364	gene9953	0.192098
NCU03795	gene7065	0.192198
NCU01569	gene3227	0.192327
NCU00693	gene1884	0.192853
NCU08650	gene6031	0.192974
NCU02070	gene357	0.193079
NCU00921	gene1642	0.193137
NCU09254	gene2390	0.193514
NCU07466	gene139	0.193749
NCU03555	gene2541	0.194126
NCU06718	gene7637	0.194313
NCU01307	gene7422	0.194393
NCU04333	gene7980	0.194627
NCU03303	gene1277	0.194821
NCU02231	gene10102	0.194825
NCU05286	gene6356	0.194886
NCU01924	gene509	0.195121
NCU05418	gene2837	0.195183
NCU07939	gene5202	0.195549
NCU02433	gene9880	0.195783
NCU02419	gene9892	0.195894
NCU02404	gene9909	0.195937
NCU03914	gene8765	0.196195
NCU01116	gene7230	0.196207
NCU03759	gene7030	0.196212
NCU02248	gene10085	0.196259
NCU02435	gene9878	0.196517
NCU07275	gene6120	0.196629
NCU01927	gene506	0.196705
NCU02232	gene10101	0.196756
NCU01267	gene7378	0.196788
NCU07024	gene6221	0.196816
NCU01634	gene3180	0.19683
NCU09737	gene5398	0.196845
NCU08605	gene2430	0.196916
NCU06101	gene9764	0.196991
NCU06594	gene5344	0.197366
NCU04174	gene7829	0.197418
NCU04111	gene7763	0.197439
NCU10061	gene8038	0.197561
NCU00358	gene4432	0.197668
NCU00108	gene4168	0.19793
NCU09063	gene9395	0.198146
NCU11402	gene2404	0.198149
NCU01418	gene7538	0.198466
NCU00421	gene4498	0.198515
NCU05757	gene10238	0.198518
NCU06266	gene4045	0.198624
NCU08023	gene5952	0.198968
NCU02719	gene873	0.19898
NCU00505	gene2073	0.199008
NCU01902	gene533	0.199458
NCU06256	gene4033	0.199781
NCU01884	gene550	0.199825
NCU08376	gene1357	0.199854
NCU07365	gene1512	0.200065
NCU09247	gene2397	0.200115
NCU08973	gene4573	0.200181
NCU09474	gene3552	0.200197
NCU04770	gene8389	0.200226
NCU07494	gene113	0.200459
NCU04036	gene8879	0.200527
NCU04534	gene9674	0.20083
NCU04516	gene5691	0.201426
NCU04199	gene7853	0.201543
NCU02595	gene749	0.201548
NCU06396	gene5566	0.20159
NCU05717	gene3729	0.20199
NCU08388	gene1345	0.202332
NCU06021	gene9851	0.202636
NCU05942	gene9033	0.202703
NCU00379	gene4453	0.202794
NCU04479	gene5736	0.202882
NCU02496	gene641	0.202971
NCU02402	gene9912	0.203091
NCU07721	gene5423	0.203209
NCU02225	gene10108	0.203221
NCU03387	gene2714	0.20323
NCU05514	gene8658	0.203419
NCU06928	gene9475	0.203496
NCU02685	gene841	0.203624
NCU06180	gene3952	0.20375
NCU02153	gene265	0.203821
NCU06609	gene5358	0.20393
NCU00364	gene4438	0.203988
NCU03310	gene1284	0.204007
NCU03796	gene7066	0.204182
NCU02003	gene427	0.204265
NCU03968	gene8809	0.204506
NCU01498	gene3296	0.204702
NCU07414	gene1465	0.205159
NCU05075	gene9162	0.205381
NCU07996	gene5921	0.205761
NCU06205	gene3981	0.206094
NCU00903	gene1657	0.206267
NCU07733	gene5412	0.206296
NCU10143	gene7735	0.20656
NCU02385	gene9931	0.206715
NCU02217	gene10116	0.206746
NCU05695	gene3706	0.206858
NCU00771	gene1802	0.207124
NCU06927	gene9474	0.207197
NCU02616	gene770	0.207286
NCU02493	gene638	0.20755
NCU06284	gene5674	0.207617
NCU02111	gene309	0.207644
NCU05632	gene8523	0.207652
NCU07460	gene145	0.207705
NCU08021	gene5949	0.207958
NCU01360	gene7477	0.208345
NCU01303	gene7418	0.208835
NCU02796	gene2336	0.208973
NCU06826	gene2908	0.209047
NCU03357	gene2746	0.209105
NCU00348	gene4421	0.209372
NCU05633	gene8522	0.209738
NCU09968	gene8280	0.209908
NCU04206	gene7859	0.210525
NCU08068	gene36	0.210671
NCU07771	gene6586	0.210728
NCU01218	gene7334	0.210781
NCU09538	gene7669	0.210859
NCU04437	gene5784	0.210893
NCU05400	gene2827	0.211093
NCU02381	gene9935	0.211312
NCU09703	gene9638	0.21135
NCU04550	gene9658	0.211488
NCU03605	gene6894	0.211504
NCU08810	gene6289	0.21158
NCU02373	gene9943	0.211796
NCU03040	gene2100	0.21217
NCU10066	gene9969	0.212194
NCU03405	gene2698	0.21222
NCU04838	gene8460	0.212263
NCU00493	gene4566	0.212448
NCU03156	gene1124	0.212576
NCU02650	gene803	0.212695
NCU05422	gene2841	0.212791
NCU01731	gene3112	0.212971
NCU04145	gene7800	0.213002
NCU02678	gene833	0.213016
NCU02260	gene10071	0.213054
NCU04946	gene5138	0.213355
NCU07471	gene136	0.213563
NCU03679	gene6957	0.213582
NCU07842	gene3774	0.213695
NCU08310	gene5517	0.214037
NCU10733	gene8414	0.214065
NCU01596	gene3206	0.214123
NCU09366	gene939	0.214182
NCU00675	gene1901	0.214415
NCU07472	gene135	0.214535
NCU06863	gene9401	0.214886
NCU00148	gene4211	0.214967
NCU02247	gene10086	0.215239
NCU05697	gene3710	0.215366
NCU02950	gene2186	0.215819
NCU02158	gene259	0.215836
NCU05221	gene6424	0.215878
NCU07451	gene155	0.216028
NCU04859	gene5034	0.216123
NCU01436	gene7737	0.216221
NCU11187	gene1952	0.216374
NCU03269	gene1238	0.216547
NCU01246	gene7358	0.216742
NCU05936	gene9040	0.216825
NCU06122	gene9743	0.216878
NCU08370	gene1364	0.21696
NCU06086	gene9776	0.217392
NCU01169	gene7278	0.217419
NCU08436	gene3473	0.217505
NCU00656	gene1919	0.217825
NCU01421	gene7541	0.21844
NCU06817	gene2915	0.218593
NCU03298	gene1271	0.218629
NCU05808	gene10296	0.218792
NCU07238	gene8089	0.218801
NCU08742	gene3425	0.219061
NCU09973	gene597	0.219407
NCU06751	gene2976	0.219433
NCU03890	gene8743	0.219719
NCU08515	gene3319	0.219743
NCU03356	gene2747	0.22016
NCU06346	gene5615	0.220311
NCU00018	gene4075	0.220363
NCU06534	gene5282	0.221172
NCU00503	gene2075	0.221481
NCU01758	gene3091	0.221744
NCU07262	gene6133	0.221855
NCU09552	gene7684	0.221972
NCU01803	gene3040	0.222525
NCU11381	gene10170	0.222537
NCU00252	gene4322	0.22277
NCU10058	gene952	0.222983
NCU02393	gene9923	0.22299
NCU02119	gene300	0.22311
NCU06342	gene5619	0.223945
NCU07247	gene8079	0.224012
NCU04181	gene7837	0.224407
NCU02725	gene880	0.224468
NCU00428	gene4505	0.224632
NCU00595	gene1980	0.224657
NCU10806	gene378	0.224696
NCU10467	gene7408	0.224697
NCU00489	gene4266	0.224822
NCU00513	gene2067	0.224871
NCU01408	gene7525	0.224889
NCU00398	gene4475	0.225169
NCU03187	gene1157	0.225271
NCU05558	gene8608	0.225709
NCU06215	gene3990	0.225894
NCU04743	gene8358	0.225908
NCU08952	gene8012	0.226008
NCU06338	gene5624	0.226063
NCU07394	gene1485	0.226239
NCU00056	gene4113	0.226703
NCU00902	gene1658	0.226968
NCU05033	gene9208	0.227103
NCU03400	gene2703	0.227155
NCU00486	gene4558	0.227445
NCU02401	gene9913	0.227519
NCU00351	gene4424	0.227634
NCU01813	gene3030	0.227641
NCU08748	gene3431	0.227644
NCU08066	gene33	0.227939
NCU03103	gene1072	0.227943
NCU02669	gene822	0.227981
NCU05214	gene6432	0.228057
NCU00410	gene4486	0.228381
NCU00008	gene4067	0.228675
NCU00072	gene4130	0.228748
NCU08637	gene2464	0.229008
NCU07319	gene6071	0.229031
NCU02414	gene9897	0.229177
NCU04304	gene7951	0.229503
NCU02224	gene10109	0.229763
NCU07066	gene8273	0.229828
NCU01820	gene3021	0.230113
NCU01607	gene3199	0.230348
NCU00377	gene4451	0.230424
NCU06203	gene3979	0.230432
NCU03964	gene8804	0.230521
NCU03860	gene8715	0.231085
NCU06968	gene6160	0.23119
NCU04761	gene8378	0.231197
NCU06051	gene9820	0.231339
NCU09071	gene188	0.23154
NCU08227	gene4736	0.231629
NCU03093	gene1062	0.23163
NCU02167	gene250	0.231725
NCU01008	gene7126	0.231893
NCU04213	gene7865	0.231977
NCU08032	gene5961	0.232016
NCU07658	gene5023	0.232109
NCU00882	gene1681	0.232174
NCU06648	gene7561	0.232206
NCU03908	gene8760	0.23235
NCU03567	gene2529	0.2329
NCU02015	gene415	0.233125
NCU02748	gene904	0.233401
NCU06048	gene9823	0.233574
NCU09710	gene9630	0.233812
NCU02745	gene900	0.23392
NCU05169	gene6478	0.234213
NCU02688	gene844	0.23433
NCU09317	gene1009	0.234366
NCU07756	gene6604	0.234407
NCU06762	gene2965	0.234726
NCU00423	gene4500	0.234993
NCU04040	gene8883	0.235008
NCU00575	gene2001	0.235295
NCU08944	gene8005	0.235307
NCU09912	gene12	0.235308
NCU01878	gene557	0.235772
NCU08307	gene5520	0.235828
NCU05889	gene10384	0.236394
NCU00974	gene1579	0.236737
NCU05423	gene2842	0.23687
NCU05453	gene2854	0.237061
NCU03211	gene1181	0.237289
NCU06310	gene5652	0.23733
NCU04327	gene7974	0.237349
NCU02949	gene2187	0.237353
NCU00034	gene4090	0.23761
NCU06768	gene2959	0.238137
NCU01085	gene7197	0.238674
NCU06167	gene9687	0.238739
NCU08945	gene8006	0.238785
NCU03692	gene6967	0.239516
NCU09460	gene9337	0.239777
NCU06202	gene3978	0.239895
NCU08007	gene5934	0.239967
NCU09539	gene7670	0.240138
NCU00600	gene1975	0.240265
NCU02770	gene2366	0.240275
NCU07850	gene3783	0.240277
NCU11313	gene3999	0.240319
NCU04650	gene6767	0.2406
NCU02534	gene683	0.24109
NCU02762	gene918	0.241907
NCU01208	gene7320	0.242087
NCU05044	gene9194	0.242134
NCU09239	gene2406	0.242324
NCU03891	gene8744	0.242551
NCU06701	gene7616	0.242606
NCU08071	gene39	0.24294
NCU05009	gene9238	0.242942
NCU03073	gene1039	0.243031
NCU04325	gene7972	0.243819
NCU06318	gene5644	0.243983
NCU00641	gene1934	0.244082
NCU08661	gene6020	0.24414
NCU08935	gene7996	0.24446
NCU08999	gene4602	0.244655
NCU10497	gene865	0.244669
NCU03339	gene2763	0.245402
NCU08676	gene6006	0.24548
NCU03631	gene6917	0.245569
NCU02234	gene10099	0.245777
NCU05386	gene2815	0.246058
NCU04232	gene7882	0.246154
NCU06177	gene3950	0.246252
NCU00100	gene4160	0.24644
NCU02525	gene673	0.246576
NCU00463	gene4537	0.246672
NCU03801	gene7071	0.246711
NCU01545	gene3250	0.246814
NCU05238	gene6405	0.246844
NCU02786	gene2348	0.246939
NCU03571	gene2525	0.246974
NCU01205	gene7317	0.247047
NCU00317	gene4393	0.247121
NCU04386	gene5841	0.247124
NCU00892	gene1668	0.247358
NCU00959	gene1596	0.247522
NCU00193	gene4257	0.247946
NCU04810	gene8432	0.248036
NCU00752	gene1822	0.248066
NCU00980	gene1572	0.248291
NCU03031	gene2110	0.248396
NCU08058	gene26	0.248803
NCU09227	gene1449	0.249074
NCU05211	gene6435	0.249198
NCU08268	gene5556	0.249285
NCU00291	gene4364	0.249354
NCU01240	gene7352	0.249359
NCU07701	gene5444	0.249433
NCU02979	gene2157	0.249593
NCU08700	gene3380	0.249664
NCU08930	gene7991	0.249671
NCU01432	gene7741	0.250272
NCU04772	gene8391	0.250512
NCU06089	gene9773	0.251321
NCU06853	gene2883	0.251812
NCU07725	gene5419	0.251815
NCU04827	gene8451	0.251818
NCU03591	gene6881	0.251821
NCU05640	gene8514	0.251879
NCU02299	gene10030	0.251999
NCU02293	gene10036	0.252108
NCU04609	gene6814	0.252196
NCU11209	gene362	0.252674
NCU03136	gene1104	0.252902
NCU07926	gene5218	0.253333
NCU09218	gene1440	0.253664
NCU07368	gene1509	0.253835
NCU06451	gene3879	0.254186
NCU06530	gene5275	0.254415
NCU02256	gene10075	0.254502
NCU04566	gene6864	0.254562
NCU03128	gene1096	0.254716
NCU09711	gene9629	0.254872
NCU02270	gene10062	0.254935
NCU03811	gene7081	0.255181
NCU06457	gene3886	0.255281
NCU04074	gene8917	0.255287
NCU02942	gene2194	0.255613
NCU09216	gene1438	0.256095
NCU06391	gene5571	0.256496
NCU02813	gene2318	0.257037
NCU07762	gene6597	0.257123
NCU02280	gene10051	0.257787
NCU00477	gene4551	0.257889
NCU03876	gene8728	0.257909
NCU02278	gene10054	0.258241
NCU00953	gene1602	0.258429
NCU05916	gene9063	0.258444
NCU03299	gene1272	0.258621
NCU07870	gene3805	0.258781
NCU04380	gene5847	0.258949
NCU05901	gene10395	0.259043
NCU00581	gene1993	0.259472
NCU00276	gene4348	0.260339
NCU07815	gene3747	0.260383
NCU03717	gene6993	0.260383
NCU05430	gene2847	0.260482
NCU03824	gene7094	0.2607
NCU04388	gene5839	0.260731
NCU08888	gene6688	0.260737
NCU07502	gene103	0.261095
NCU04766	gene8385	0.26116
NCU04299	gene7946	0.261279
NCU10777	gene6272	0.261869
NCU03394	gene2709	0.262119
NCU03885	gene8737	0.262208
NCU03283	gene1252	0.262512
NCU03719	gene6995	0.262949
NCU02151	gene267	0.263038
NCU02731	gene886	0.263359
NCU11027	gene7390	0.263368
NCU00234	gene4303	0.263384
NCU08454	gene3370	0.26373
NCU00458	gene4533	0.264047
NCU07264	gene6131	0.264048
NCU00278	gene4350	0.264688
NCU04117	gene7769	0.264975
NCU04044	gene8888	0.265635
NCU04673	gene6741	0.265801
NCU01801	gene3042	0.265873
NCU07776	gene6580	0.266466
NCU03496	gene2599	0.266694
NCU00006	gene4065	0.267171
NCU09233	gene2413	0.267237
NCU02068	gene360	0.267269
NCU03704	gene6979	0.267396
NCU07458	gene148	0.267619
NCU01997	gene433	0.268145
NCU08360	gene1377	0.268188
NCU06275	gene4055	0.268592
NCU02846	gene2296	0.268607
NCU05992	gene8974	0.268877
NCU01227	gene7343	0.268919
NCU09894	gene959	0.269077
NCU01324	gene7440	0.269119
NCU00194	gene4258	0.269138
NCU00542	gene2039	0.26925
NCU05129	gene9105	0.269501
NCU03678	gene6956	0.269685
NCU01032	gene7144	0.270046
NCU02118	gene301	0.27036
NCU05634	gene8521	0.270455
NCU00015	gene4073	0.271291
NCU06539	gene5288	0.271553
NCU00881	gene1682	0.271661
NCU03569	gene2527	0.271771
NCU02952	gene2184	0.271871
NCU06746	gene2981	0.272085
NCU08669	gene6012	0.272211
NCU09467	gene3545	0.272436
NCU01219	gene7335	0.273218
NCU04830	gene8453	0.273316
NCU11223	gene3275	0.273351
NCU00270	gene4342	0.273356
NCU05196	gene6450	0.273452
NCU10028	gene2473	0.273972
NCU04492	gene5717	0.274473
NCU04442	gene5780	0.274901
NCU04224	gene7874	0.27591
NCU00494	gene4567	0.276167
NCU08688	gene5990	0.276452
NCU05076	gene9161	0.276474
NCU02315	gene10013	0.276501
NCU00074	gene4132	0.276501
NCU04404	gene5820	0.277099
NCU00065	gene4122	0.277313
NCU09048	gene9379	0.277368
NCU09544	gene7675	0.277374
NCU08947	gene8008	0.277752
NCU05606	gene8553	0.278761
NCU10897	gene5568	0.279894
NCU01196	gene7308	0.280074
NCU05053	gene9184	0.280193
NCU05608	gene8551	0.28027
NCU03195	gene1165	0.280478
NCU02632	gene786	0.280699
NCU03230	gene1203	0.281106
NCU04592	gene6834	0.281674
NCU06251	gene4027	0.281972
NCU02052	gene377	0.281978
NCU04760	gene8377	0.283225
NCU05429	gene2846	0.283916
NCU03733	gene7005	0.28392
NCU06893	gene9435	0.284146
NCU02829	gene2308	0.284746
NCU08049	gene16	0.285024
NCU05902	gene10396	0.285152
NCU06478	gene3906	0.285347
NCU04588	gene6839	0.285401
NCU09030	gene9359	0.285491
NCU05244	gene6400	0.285858
NCU06085	gene9777	0.285994
NCU04642	gene6776	0.286201
NCU00843	gene1725	0.28627
NCU06481	gene3909	0.286478
NCU06365	gene5596	0.286485
NCU07588	gene4944	0.286576
NCU01236	gene7350	0.28683
NCU03516	gene2578	0.286961
NCU01171	gene7280	0.287114
NCU05771	gene10256	0.287332
NCU03061	gene1028	0.287461
NCU05203	gene6443	0.288197
NCU05995	gene8969	0.288263
NCU09616	gene2490	0.28827
NCU01810	gene3033	0.288431
NCU07755	gene6605	0.289116
NCU03266	gene1235	0.289228
NCU03760	gene7031	0.289567
NCU00827	gene1742	0.289629
NCU00382	gene4457	0.28965
NCU07742	gene6619	0.289795
NCU09870	gene8698	0.289851
NCU08001	gene5927	0.289992
NCU05777	gene10264	0.290087
NCU01698	gene3130	0.290794
NCU09316	gene1010	0.290892
NCU06638	gene7550	0.291094
NCU01252	gene7363	0.291211
NCU06882	gene9422	0.291423
NCU04081	gene8926	0.291677
NCU00663	gene1913	0.291944
NCU04604	gene6820	0.292218
NCU02886	gene2254	0.29222
NCU00618	gene1959	0.292284
NCU08009	gene5936	0.292613
NCU07060	gene8283	0.292746
NCU04191	gene7844	0.293497
NCU03503	gene2592	0.293622
NCU08929	gene7990	0.29365
NCU00929	gene1630	0.293896
NCU03417	gene2683	0.294238
NCU09439	gene9317	0.294719
NCU06949	gene9500	0.294944
NCU06734	gene2993	0.295507
NCU04898	gene5083	0.295554
NCU01765	gene3084	0.295654
NCU02757	gene913	0.295909
NCU04665	gene6753	0.296057
NCU10046	gene9001	0.296137
NCU07833	gene3766	0.296253
NCU06482	gene3910	0.29661
NCU09806	gene971	0.296986
NCU05000	gene9249	0.297445
NCU03870	gene8722	0.297668
NCU00205	gene4270	0.297945
NCU06772	gene2956	0.298351
NCU05804	gene10293	0.298361
NCU05706	gene3717	0.298418
NCU09643	gene4913	0.298459
NCU04408	gene5816	0.298669
NCU02360	gene9957	0.299296
NCU01722	gene3117	0.299479
NCU05290	gene6352	0.299565
NCU06227	gene4003	0.299693
NCU07972	gene5169	0.300154
NCU08054	gene22	0.300249
NCU03125	gene1093	0.300638
NCU05798	gene10286	0.300659
NCU03194	gene1164	0.300701
NCU03404	gene2699	0.300765
NCU09318	gene1008	0.301205
NCU02305	gene10024	0.301613
NCU03215	gene1185	0.301834
NCU08844	gene6250	0.302038
NCU02934	gene2202	0.302116
NCU01334	gene7451	0.302393
NCU02522	gene670	0.302605
NCU00631	gene4649	0.302733
NCU02515	gene661	0.30289
NCU05232	gene6411	0.303071
NCU03233	gene1206	0.303539
NCU04293	gene7940	0.303694
NCU01824	gene3017	0.303719
NCU06407	gene3831	0.303764
NCU03148	gene1115	0.304001
NCU08792	gene4850	0.304042
NCU08277	gene5546	0.304396
NCU07549	gene4658	0.304403
NCU10069	gene1020	0.304993
NCU08848	gene6540	0.305037
NCU04411	gene5813	0.305603
NCU00551	gene2029	0.305825
NCU06083	gene9780	0.305945
NCU03548	gene2549	0.306183
NCU06273	gene4052	0.306186
NCU02400	gene9914	0.306279
NCU00846	gene1721	0.30674
NCU00163	gene4226	0.307076
NCU01500	gene3293	0.307285
NCU07528	gene4683	0.307852
NCU06857	gene2878	0.308128
NCU08763	gene4888	0.308276
NCU03137	gene1105	0.308612
NCU09477	gene3555	0.308905
NCU01947	gene486	0.309271
NCU00200	gene4264	0.309352
NCU04903	gene5088	0.309606
NCU01335	gene7452	0.309664
NCU02244	gene10089	0.309727
NCU04274	gene7919	0.309856
NCU02291	gene10038	0.310009
NCU09807	gene972	0.310119
NCU09022	gene9351	0.310124
NCU09994	gene951	0.31027
NCU10381	gene3156	0.310385
NCU05385	gene2814	0.310453
NCU10282	gene2342	0.311539
NCU01154	gene7261	0.311688
NCU04381	gene5846	0.311885
NCU04454	gene5767	0.311978
NCU08997	gene4600	0.312139
NCU03826	gene7096	0.312541
NCU04015	gene8858	0.312903
NCU05968	gene9004	0.314605
NCU00814	gene1753	0.315042
NCU04227	gene7877	0.315769
NCU07851	gene3784	0.316111
NCU02057	gene372	0.316185
NCU09550	gene7682	0.316213
NCU01067	gene7179	0.316307
NCU07828	gene3761	0.316377
NCU01245	gene7357	0.316444
NCU09502	gene3603	0.316675
NCU03489	gene2608	0.316735
NCU04203	gene7857	0.317029
NCU02353	gene9964	0.317187
NCU02507	gene652	0.317259
NCU05917	gene9062	0.317595
NCU08150	gene10182	0.317737
NCU00025	gene4081	0.317893
NCU07123	gene8215	0.318723
NCU07420	gene1459	0.318741
NCU03045	gene2093	0.319777
NCU02724	gene879	0.319904
NCU00392	gene4468	0.320338
NCU00912	gene1651	0.32042
NCU02022	gene408	0.320461
NCU07822	gene3755	0.320511
NCU09686	gene6711	0.32054
NCU08359	gene1378	0.320619
NCU04453	gene5768	0.320673
NCU02463	gene607	0.320688
NCU07971	gene5170	0.320769
NCU07534	gene4675	0.321215
NCU06401	gene5561	0.321275
NCU09599	gene2505	0.321287
NCU06317	gene5645	0.32175
NCU08961	gene8024	0.322049
NCU07778	gene6579	0.322528
NCU06487	gene3917	0.323009
NCU01369	gene7486	0.323011
NCU02395	gene9921	0.323142
NCU00565	gene2013	0.323542
NCU03008	gene2135	0.323819
NCU01419	gene7539	0.323853
NCU00120	gene4181	0.324318
NCU06756	gene2971	0.324558
NCU00269	gene4341	0.324878
NCU07415	gene1464	0.325568
NCU03023	gene2118	0.326178
NCU03270	gene1239	0.326646
NCU05426	gene2844	0.326828
NCU00770	gene1803	0.327373
NCU06626	gene5376	0.327399
NCU04041	gene8884	0.327659
NCU04061	gene8903	0.328205
NCU01465	gene7705	0.328315
NCU09206	gene1425	0.328955
NCU08391	gene1342	0.329256
NCU08174	gene10209	0.329317
NCU04207	gene7860	0.329871
NCU09157	gene3621	0.330014
NCU08288	gene5537	0.330356
NCU08768	gene4881	0.330486
NCU06141	gene9721	0.330554
NCU01613	gene3194	0.330699
NCU00676	gene1900	0.331068
NCU10893	gene2408	0.331276
NCU03203	gene1173	0.331451
NCU07707	gene5438	0.331459
NCU02116	gene303	0.331702
NCU04048	gene8892	0.331744
NCU08606	gene2431	0.332061
NCU01053	gene7163	0.332219
NCU01097	gene7211	0.332835
NCU06095	gene9768	0.333393
NCU11138	gene7471	0.33372
NCU02726	gene881	0.333735
NCU05248	gene6396	0.333954
NCU02049	gene381	0.334743
NCU03694	gene6969	0.335077
NCU06034	gene9837	0.335433
NCU04312	gene7958	0.33555
NCU00279	gene4351	0.335762
NCU09098	gene217	0.336669
NCU07997	gene5922	0.337102
NCU02605	gene759	0.337619
NCU00226	gene4295	0.338346
NCU06620	gene5370	0.338622
NCU03823	gene7093	0.338703
NCU00427	gene4504	0.339183
NCU06380	gene5582	0.340021
NCU09610	gene2495	0.340043
NCU05208	gene6437	0.340239
NCU02674	gene829	0.340516
NCU04808	gene8430	0.341006
NCU00132	gene4196	0.34157
NCU08336	gene1403	0.341924
NCU05373	gene2801	0.342219
NCU05987	gene8979	0.342511
NCU00078	gene4136	0.34266
NCU02795	gene2337	0.342921
NCU09333	gene990	0.343415
NCU09642	gene4912	0.343666
NCU08552	gene4811	0.343973
NCU07193	gene8134	0.345075
NCU02660	gene813	0.345731
NCU01520	gene3274	0.346156
NCU04281	gene7927	0.346394
NCU08000	gene5926	0.346817
NCU06111	gene9754	0.347119
NCU00506	gene2072	0.347351
NCU04726	gene8337	0.347357
NCU02797	gene2335	0.347433
NCU08629	gene2455	0.347718
NCU08283	gene5539	0.347893
NCU01993	gene438	0.349482
NCU07963	gene5178	0.349648
NCU06428	gene3857	0.349749
NCU08974	gene4575	0.350276
NCU07909	gene5235	0.350424
NCU07389	gene1489	0.350934
NCU04412	gene5812	0.351262
NCU01818	gene3023	0.351422
NCU05623	gene8534	0.351691
NCU07221	gene8105	0.35173
NCU09036	gene9366	0.351785
NCU07934	gene5208	0.351841
NCU07967	gene5174	0.351865
NCU06435	gene3864	0.351903
NCU09175	gene3642	0.352248
NCU08195	gene4710	0.352282
NCU00487	gene4559	0.352584
NCU04155	gene7810	0.352862
NCU09535	gene7666	0.353112
NCU11212	gene318	0.353249
NCU01835	gene3008	0.354282
NCU07495	gene111	0.354653
NCU01996	gene435	0.354775
NCU05939	gene9037	0.355509
NCU00022	gene4078	0.356309
NCU00630	gene1944	0.356831
NCU09253	gene2391	0.357062
NCU09352	gene3501	0.357384
NCU04843	gene8465	0.357689
NCU03077	gene1042	0.357978
NCU00294	gene4368	0.357982
NCU09647	gene4917	0.358185
NCU05560	gene8606	0.358646
NCU04767	gene8386	0.358913
NCU07465	gene140	0.359103
NCU06073	gene9791	0.359335
NCU01294	gene7407	0.359631
NCU02157	gene260	0.359734
NCU07931	gene5213	0.359989
NCU10392	gene3462	0.360043
NCU03280	gene1248	0.360131
NCU11287	gene4837	0.360422
NCU06361	gene5600	0.360662
NCU05582	gene8582	0.361737
NCU09078	gene196	0.362036
NCU01522	gene3272	0.362699
NCU05060	gene9177	0.363159
NCU08886	gene6691	0.363336
NCU08011	gene5938	0.364937
NCU10049	gene8999	0.366537
NCU09219	gene1441	0.367167
NCU03661	gene6946	0.367255
NCU00114	gene4175	0.367278
NCU07509	gene95	0.368352
NCU00024	gene4080	0.36844
NCU03574	gene2522	0.368849
NCU01386	gene7502	0.368972
NCU05061	gene9176	0.369073
NCU00952	gene1603	0.369611
NCU09615	gene2491	0.370417
NCU01364	gene7480	0.371076
NCU11261	gene7019	0.371762
NCU06398	gene5564	0.37186
NCU01570	gene3226	0.372464
NCU03150	gene1117	0.372827
NCU08290	gene5535	0.372847
NCU00275	gene4347	0.373133
NCU06320	gene5642	0.373371
NCU09783	gene8477	0.374052
NCU04084	gene8929	0.374115
NCU07240	gene8087	0.374356
NCU04192	gene7846	0.374477
NCU08329	gene5498	0.374478
NCU02134	gene283	0.374531
NCU08618	gene2443	0.374547
NCU03929	gene8775	0.375177
NCU07826	gene3759	0.375226
NCU01146	gene7252	0.375369
NCU09089	gene207	0.376036
NCU00669	gene1906	0.376057
NCU06515	gene5259	0.376797
NCU02811	gene2320	0.376997
NCU04505	gene5702	0.377234
NCU05281	gene6361	0.377724
NCU03271	gene1240	0.37787
NCU09882	gene1543	0.378584
NCU09929	gene6313	0.378982
NCU07875	gene3809	0.379392
NCU00971	gene1582	0.379496
NCU03966	gene8806	0.380926
NCU08788	gene4854	0.381479
NCU08766	gene4883	0.3821
NCU00927	gene1632	0.382601
NCU03853	gene8708	0.383202
NCU00102	gene4162	0.383665
NCU00722	gene1853	0.384076
NCU08476	gene3354	0.384178
NCU08733	gene3415	0.384385
NCU00405	gene4481	0.385255
NCU01383	gene7500	0.385831
NCU06538	gene5287	0.386217
NCU00450	gene4526	0.386221
NCU00598	gene1977	0.386448
NCU01521	gene3273	0.386728
NCU07409	gene1470	0.387374
NCU00202	gene1943	0.387753
NCU06936	gene9483	0.388577
NCU06406	gene3828	0.389148
NCU08621	gene2446	0.389471
NCU04367	gene5861	0.390022
NCU04014	gene8857	0.390641
NCU06708	gene7627	0.390654
NCU11215	gene8970	0.391738
NCU08136	gene10166	0.392291
NCU02201	gene10134	0.392688
NCU06131	gene9731	0.392724
NCU00310	gene4385	0.393372
NCU09129	gene1326	0.394141
NCU05545	gene8621	0.394201
NCU06471	gene3898	0.394652
NCU06010	gene8954	0.395255
NCU05250	gene6393	0.395809
NCU11236	gene666	0.396047
NCU04855	gene5031	0.397773
NCU08966	gene8029	0.398746
NCU06340	gene5622	0.398771
NCU04503	gene5704	0.399368
NCU03246	gene1219	0.399871
NCU06047	gene9824	0.401195
NCU03931	gene8776	0.401265
NCU00749	gene1826	0.402067
NCU08292	gene5533	0.403384
NCU09935	gene6308	0.403431
NCU06065	gene9801	0.403704
NCU03904	gene8756	0.405656
NCU10264	gene1879	0.406942
NCU00634	gene1940	0.407726
NCU03086	gene1053	0.407743
NCU06211	gene3986	0.408163
NCU05814	gene10302	0.408275
NCU05360	gene2795	0.409996
NCU04382	gene5845	0.410311
NCU07314	gene6076	0.410505
NCU01463	gene7707	0.410508
NCU01317	gene7433	0.410596
NCU06214	gene3989	0.41065
NCU07837	gene3769	0.411179
NCU06946	gene9496	0.411448
NCU07013	gene6209	0.412121
NCU00906	gene1654	0.412436
NCU07268	gene6127	0.412762
NCU04469	gene5749	0.412793
NCU03441	gene2656	0.412822
NCU09238	gene2409	0.413237
NCU04243	gene7893	0.41461
NCU01404	gene7522	0.415297
NCU01552	gene3242	0.416019
NCU02391	gene9925	0.416101
NCU00824	gene1745	0.416374
NCU04403	gene5821	0.417012
NCU03950	gene8793	0.417153
NCU09816	gene983	0.417861
NCU07876	gene3810	0.418443
NCU02281	gene10050	0.419129
NCU00740	gene1835	0.420117
NCU04614	gene6809	0.420585
NCU07753	gene6607	0.420736
NCU09244	gene2400	0.420759
NCU01839	gene3004	0.420916
NCU01422	gene7542	0.421473
NCU07519	gene4694	0.42152
NCU07551	gene4656	0.421625
NCU06707	gene7626	0.421644
NCU04277	gene7922	0.422249
NCU02106	gene314	0.42297
NCU07455	gene151	0.423024
NCU06417	gene3844	0.423252
NCU07915	gene5229	0.423504
NCU10483	gene2674	0.4246
NCU08500	gene3337	0.42465
NCU01452	gene7718	0.42542
NCU05176	gene6472	0.425988
NCU06276	gene4056	0.426088
NCU08620	gene2445	0.426104
NCU05525	gene8645	0.426276
NCU01400	gene7518	0.427543
NCU04762	gene8379	0.428066
NCU03308	gene1282	0.428172
NCU08177	gene10213	0.428598
NCU03703	gene6978	0.42877
NCU06596	gene5346	0.428948
NCU06743	gene2985	0.429202
NCU07004	gene6201	0.429767
NCU06414	gene3840	0.430201
NCU07386	gene1492	0.430488
NCU07182	gene8145	0.430514
NCU06395	gene5567	0.431321
NCU05641	gene8513	0.431532
NCU04020	gene8864	0.43172
NCU11337	gene7588	0.431872
NCU01321	gene7437	0.431884
NCU00296	gene4370	0.432157
NCU03329	gene2776	0.432624
NCU02544	gene695	0.433001
NCU04331	gene6210	0.433067
NCU07175	gene8155	0.433145
NCU08386	gene1347	0.434311
NCU04545	gene9664	0.434927
NCU06252	gene4029	0.434989
NCU08352	gene1387	0.435017
NCU00977	gene1575	0.435148
NCU07014	gene3763	0.43538
NCU08556	gene4807	0.435515
NCU09602	gene2503	0.435567
NCU04340	gene5891	0.435779
NCU04799	gene8420	0.436075
NCU07157	gene8175	0.436555
NCU06130	gene9732	0.436628
NCU09475	gene3553	0.436767
NCU08954	gene8014	0.437378
NCU05242	gene6402	0.437496
NCU06231	gene4008	0.437497
NCU00935	gene1624	0.438675
NCU11012	gene4094	0.43943
NCU03925	gene8771	0.439812
NCU00853	gene1713	0.439982
NCU04233	gene7883	0.440221
NCU02707	gene863	0.4412
NCU00916	gene1647	0.441746
NCU04721	gene8332	0.442583
NCU09050	gene9381	0.442846
NCU07192	gene8135	0.442941
NCU08502	gene3335	0.443025
NCU01811	gene3032	0.443383
NCU09091	gene209	0.444244
NCU03600	gene6889	0.444446
NCU09911	gene11	0.445046
NCU05873	gene10365	0.445113
NCU09476	gene3554	0.445167
NCU08963	gene8026	0.445751
NCU02720	gene874	0.446422
NCU03614	gene6902	0.44719
NCU10360	gene7277	0.44797
NCU08712	gene3393	0.448117
NCU00659	gene1916	0.448355
NCU03840	gene7109	0.448492
NCU01505	gene3288	0.449081
NCU06978	gene6172	0.449998
NCU00863	gene1701	0.450493
NCU08064	gene31	0.450745
NCU00258	gene4562	0.451399
NCU03449	gene2651	0.451629
NCU06932	gene9479	0.45218
NCU10012	gene8693	0.452631
NCU03361	gene2741	0.453235
NCU00475	gene4549	0.453934
NCU02567	gene720	0.454233
NCU08858	gene6527	0.454699
NCU11414	gene4927	0.454791
NCU00715	gene1862	0.455569
NCU03035	gene2106	0.455931
NCU09760	gene3531	0.456028
NCU01776	gene3076	0.456141
NCU10008	gene181	0.457032
NCU02701	gene857	0.457431
NCU04802	gene8423	0.458304
NCU07541	gene4666	0.459133
NCU07008	gene6204	0.460151
NCU08718	gene3399	0.460508
NCU08737	gene3419	0.46201
NCU09596	gene2509	0.46231
NCU08445	gene3481	0.462675
NCU04779	gene8400	0.462727
NCU09427	gene9558	0.463149
NCU03647	gene6934	0.463323
NCU07649	gene5015	0.463649
NCU00847	gene1720	0.464143
NCU03565	gene2531	0.464812
NCU03637	gene6923	0.465951
NCU09651	gene4922	0.467092
NCU05836	gene10328	0.46792
NCU02409	gene9904	0.468092
NCU02558	gene711	0.468469
NCU08544	gene4821	0.469212
NCU00413	gene4490	0.469466
NCU00975	gene1578	0.469571
NCU02509	gene654	0.469751
NCU03152	gene1119	0.47051
NCU03806	gene7076	0.470567
NCU04622	gene6798	0.471456
NCU01488	gene3304	0.471648
NCU08350	gene1389	0.47225
NCU03132	gene1100	0.472988
NCU03305	gene1279	0.473002
NCU03038	gene2102	0.473295
NCU00774	gene1799	0.473326
NCU01741	gene3105	0.474195
NCU09443	gene9321	0.474487
NCU07907	gene5237	0.474503
NCU03755	gene7026	0.474609
NCU05550	gene8617	0.475216
NCU01949	gene484	0.475478
NCU05579	gene8585	0.476479
NCU00326	gene4401	0.476505
NCU04553	gene9655	0.476772
NCU00655	gene1920	0.477473
NCU03082	gene1048	0.477872
NCU07587	gene4943	0.478071
NCU02181	gene230	0.478917
NCU01763	gene3086	0.479822
NCU04310	gene7957	0.480239
NCU01259	gene7372	0.480882
NCU06724	gene7646	0.481314
NCU05723	gene3734	0.481648
NCU06700	gene7615	0.482855
NCU05554	gene8613	0.483558
NCU00954	gene1601	0.48365
NCU05010	gene9236	0.484035
NCU03219	gene1189	0.484247
NCU04552	gene7978	0.484508
NCU03686	gene6962	0.484698
NCU09514	gene3589	0.484754
NCU07338	gene6045	0.485531
NCU08998	gene4601	0.486188
NCU03102	gene1071	0.486764
NCU09579	gene9521	0.486766
NCU05583	gene8581	0.486898
NCU06210	gene3985	0.487209
NCU02083	gene343	0.48805
NCU05646	gene8508	0.488399
NCU06431	gene3860	0.488486
NCU06333	gene5629	0.489119
NCU04905	gene5090	0.489346
NCU02480	gene624	0.489472
NCU04409	gene5815	0.489597
NCU01888	gene547	0.489794
NCU07459	gene146	0.490544
NCU01442	gene7729	0.491809
NCU09109	gene1304	0.492366
NCU07741	gene6620	0.492378
NCU00378	gene4452	0.493856
NCU03180	gene1149	0.494438
NCU05735	gene3743	0.494505
NCU01457	gene7713	0.494948
NCU08344	gene1395	0.495665
NCU03988	gene8834	0.496246
NCU05217	gene6429	0.496344
NCU04443	gene5779	0.496657
NCU00028	gene4084	0.496813
NCU04150	gene7805	0.498036
NCU10697	gene9169	0.498078
NCU01636	gene3178	0.498303
NCU01653	gene3162	0.498949
NCU04255	gene7902	0.49981
NCU05119	gene9118	0.500612
NCU07450	gene156	0.500847
NCU00121	gene4182	0.501684
NCU08617	gene2442	0.501898
NCU01221	gene7338	0.502425
NCU10276	gene4836	0.502762
NCU09058	gene9390	0.50363
NCU02975	gene2161	0.504522
NCU07288	gene6108	0.504665
NCU03302	gene1276	0.505356
NCU03889	gene8742	0.505919
NCU01365	gene7481	0.505998
NCU01948	gene485	0.506
NCU09137	gene1334	0.506562
NCU07557	gene4648	0.507269
NCU04645	gene6772	0.507852
NCU00214	gene4281	0.50858
NCU06250	gene4026	0.50885
NCU06926	gene9473	0.509306
NCU05435	gene2849	0.50963
NCU03176	gene1145	0.510364
NCU06469	gene3896	0.511507
NCU02150	gene268	0.511549
NCU06720	gene7640	0.511787
NCU03963	gene8803	0.512535
NCU01827	gene3015	0.512737
NCU05810	gene10298	0.51282
NCU06651	gene7564	0.512969
NCU06077	gene9787	0.513041
NCU07829	gene3762	0.513176
NCU03756	gene7027	0.514096
NCU07841	gene3773	0.51414
NCU00652	gene1923	0.514164
NCU08092	gene62	0.514895
NCU06726	gene7648	0.514926
NCU00778	gene1795	0.514992
NCU06230	gene4007	0.515611
NCU04669	gene6747	0.515762
NCU01666	gene3151	0.515907
NCU04127	gene7781	0.516416
NCU03364	gene2737	0.517537
NCU06277	gene4058	0.518057
NCU02365	gene9952	0.518487
NCU01652	gene3163	0.519386
NCU05900	gene10394	0.519635
NCU02744	gene899	0.520214
NCU06360	gene5602	0.521786
NCU06254	gene4031	0.522134
NCU07016	gene6213	0.522648
NCU11067	gene5162	0.523188
NCU10038	gene6494	0.52423
NCU08537	gene4827	0.524279
NCU06090	gene9772	0.524682
NCU02905	gene2234	0.525097
NCU00673	gene1903	0.525109
NCU08709	gene3390	0.526875
NCU06088	gene9774	0.527847
NCU05114	gene9123	0.528919
NCU06868	gene9408	0.52904
NCU03336	gene2767	0.529435
NCU10226	gene10053	0.531181
NCU00915	gene1648	0.531828
NCU02192	gene10147	0.53278
NCU07516	gene4697	0.534071
NCU08554	gene4809	0.53711
NCU04049	gene8893	0.537764
NCU02596	gene750	0.538608
NCU01781	gene3071	0.539903
NCU07830	gene4328	0.541484
NCU07408	gene1471	0.542397
NCU05894	gene10389	0.542401
NCU09138	gene1335	0.54241
NCU01281	gene7394	0.542518
NCU07032	gene6229	0.542711
NCU04201	gene7854	0.542926
NCU06009	gene8955	0.543134
NCU03551	gene2546	0.543205
NCU02690	gene846	0.543246
NCU04923	gene5112	0.544198
NCU07562	gene4642	0.544281
NCU07589	gene4945	0.544872
NCU07864	gene3797	0.546018
NCU09545	gene7676	0.546062
NCU07027	gene6222	0.546604
NCU06843	gene2893	0.546946
NCU11196	gene1673	0.547224
NCU03183	gene1152	0.54807
NCU09033	gene9363	0.548494
NCU09159	gene3623	0.549519
NCU01487	gene3305	0.549533
NCU06000	gene8964	0.549697
NCU02956	gene2180	0.551115
NCU03133	gene1101	0.552327
NCU08382	gene1351	0.552714
NCU04383	gene5844	0.55278
NCU05624	gene8533	0.55434
NCU02969	gene2166	0.555937
NCU07369	gene1508	0.55695
NCU03649	gene6936	0.556977
NCU07113	gene8224	0.557155
NCU06432	gene3861	0.557852
NCU04410	gene5814	0.558436
NCU00515	gene2066	0.558851
NCU11237	gene665	0.560953
NCU02597	gene751	0.561076
NCU03681	gene6958	0.561642
NCU06226	gene4002	0.561905
NCU07671	gene5483	0.562653
NCU01157	gene7265	0.563549
NCU11424	gene9260	0.563853
NCU05523	gene8647	0.563986
NCU00535	gene2045	0.564206
NCU05163	gene6485	0.564344
NCU03758	gene7029	0.565457
NCU08674	gene6008	0.565497
NCU04133	gene7788	0.565502
NCU01968	gene464	0.565862
NCU01000	gene7118	0.56869
NCU06841	gene2895	0.570165
NCU04112	gene7764	0.570835
NCU06416	gene3843	0.570885
NCU06522	gene5267	0.571098
NCU08960	gene8022	0.571486
NCU08923	gene7982	0.571683
NCU01115	gene7229	0.573061
NCU01104	gene7218	0.573345
NCU01147	gene7253	0.573887
NCU07467	gene138	0.575442
NCU01181	gene7291	0.575862
NCU03545	gene2552	0.575912
NCU11338	gene7585	0.576386
NCU00717	gene1859	0.577178
NCU08358	gene1379	0.577521
NCU06245	gene4021	0.577645
NCU06763	gene2964	0.578854
NCU08230	gene4739	0.579215
NCU08478	gene3352	0.579485
NCU08721	gene3403	0.579683
NCU06643	gene7556	0.579736
NCU07412	gene1467	0.579907
NCU09619	gene2488	0.579956
NCU03715	gene6991	0.582884
NCU06773	gene2954	0.58384
NCU01704	gene3124	0.583858
NCU00979	gene1573	0.584141
NCU02976	gene2160	0.586517
NCU07036	gene6234	0.58706
NCU07210	gene8115	0.587317
NCU09792	gene8490	0.587931
NCU00151	gene4214	0.588538
NCU09207	gene1428	0.589225
NCU05882	gene10375	0.589554
NCU09057	gene9389	0.590528
NCU09355	gene3505	0.590834
NCU07564	gene4640	0.591286
NCU10142	gene3357	0.59179
NCU00860	gene1705	0.592271
NCU11185	gene4561	0.592621
NCU09323	gene1002	0.592723
NCU07393	gene1486	0.592737
NCU08076	gene45	0.593336
NCU06185	gene3957	0.593474
NCU03013	gene2130	0.593723
NCU02159	gene258	0.594317
NCU04647	gene6770	0.594483
NCU02396	gene9920	0.59524
NCU06935	gene9482	0.595288
NCU04488	gene5725	0.596279
NCU01136	gene7243	0.596678
NCU02713	gene869	0.597876
NCU07956	gene5184	0.59856
NCU06096	gene9767	0.600408
NCU05151	gene9085	0.600499
NCU01106	gene7221	0.600874
NCU08655	gene6027	0.601908
NCU07136	gene8200	0.60408
NCU01078	gene7190	0.604164
NCU02656	gene809	0.604894
NCU05832	gene10324	0.605062
NCU07802	gene6556	0.605932
NCU10468	gene7409	0.607106
NCU05594	gene8566	0.607538
NCU02622	gene776	0.608465
NCU02488	gene631	0.609095
NCU09728	gene5408	0.609287
NCU00808	gene1759	0.609727
NCU05161	gene6487	0.609793
NCU04930	gene5121	0.609909
NCU06263	gene4041	0.611119
NCU09986	gene9348	0.612109
NCU01331	gene7448	0.612465
NCU05829	gene10321	0.613549
NCU01632	gene3183	0.613731
NCU05535	gene8635	0.614599
NCU07100	gene8240	0.615177
NCU01241	gene7354	0.615645
NCU08308	gene5519	0.615877
NCU03188	gene1158	0.616256
NCU08545	gene4820	0.616936
NCU01423	gene7543	0.619034
NCU08977	gene4578	0.619264
NCU08899	gene6676	0.620784
NCU07396	gene1483	0.621417
NCU00409	gene4485	0.621433
NCU09521	gene3582	0.622157
NCU03319	gene1293	0.622348
NCU04861	gene5037	0.625674
NCU06618	gene5368	0.625721
NCU08159	gene10191	0.626779
NCU02086	gene339	0.626835
NCU05934	gene9043	0.62724
NCU04045	gene8889	0.627685
NCU02239	gene10094	0.62812
NCU00281	gene4353	0.628538
NCU07453	gene153	0.628712
NCU00586	gene1988	0.629127
NCU03751	gene7022	0.631509
NCU03490	gene2607	0.63233
NCU08165	gene10196	0.633006
NCU07168	gene8163	0.635347
NCU04467	gene5751	0.635711
NCU04907	gene5093	0.635921
NCU00321	gene4397	0.636341
NCU06782	gene2944	0.638917
NCU05410	gene2832	0.639084
NCU06619	gene5369	0.639267
NCU02100	gene322	0.639293
NCU01529	gene3265	0.640834
NCU09739	gene5395	0.641605
NCU04887	gene5072	0.642387
NCU00510	gene2069	0.64267
NCU05597	gene8563	0.642813
NCU06691	gene7607	0.644403
NCU00305	gene4380	0.644475
NCU04118	gene7770	0.649265
NCU06402	gene5560	0.6499
NCU07362	gene1515	0.650453
NCU05854	gene10347	0.650994
NCU05510	gene8664	0.652037
NCU07353	gene1525	0.652346
NCU01381	gene7498	0.652913
NCU02220	gene10113	0.653032
NCU03016	gene2127	0.653131
NCU05022	gene9224	0.65358
NCU01786	gene3065	0.653875
NCU05637	gene8517	0.654151
NCU04675	gene6739	0.654989
NCU05149	gene9087	0.655694
NCU06467	gene3894	0.656264
NCU07041	gene6238	0.65663
NCU02194	gene10144	0.65743
NCU01612	gene3195	0.660265
NCU01667	gene3150	0.661653
NCU07108	gene8229	0.662462
[truncated: 1,261 more rows]
